# Supplementary material for: Nonpolar selective emission (NPSE) of carbonyl-bridged rhodols
Source: Royal Society of Chemistry journal article supplement (doi:10.1039/d4cc01071j), 2024-01-01
Supplement: d4cc01071j1.pdf [file d4cc01071j1.pdf]

**Supporting Information for**

**Nonpolar selective emission (NPSE) of carbonyl-bridged rhodols**

Masaru Tanioka,<sup>a</sup> Minori Mori,<sup>b</sup> Mei Harada,<sup>b</sup> Yuji Matsuya,<sup>a</sup> and Shinichiro Kamino<sup>b</sup>

<sup>a</sup>Faculty of Pharmaceutical Sciences, University of Toyama, 2630 Sugitani, Toyama 930-0194, Japan.

<sup>b</sup>School of Pharmacy, Aichi Gakuin University, 1-100 Kusumoto-cho, Chikusa-ku, Nagoya 464-8650, Japan.

## **Table of Contents**

**1. Instrumentation and Materials**

**2. Experimental Procedure**

**3. Single X-ray Structure Analysis**

**4. Optical Properties and DFT calculation**

**5. Gas Sensor and Time-dependent Security Ink by utilizing the NPSE**

**6. NMR Spectra of Compounds**

**7. Cartesian Coordinates (in Å) and Energies**

## 1. Instrumentation and Materials

### Instruments

$^1\text{H}$ - and  $^{13}\text{C}$ -NMR spectra were recorded on JEOL ECZ 400S spectrometer (400 MHz for  $^1\text{H}$ -NMR and 100 MHz for  $^{13}\text{C}$ -NMR) and JEOL ECA 500 spectrometer (500 MHz for  $^1\text{H}$ -NMR and 125 MHz for  $^{13}\text{C}$ -NMR).  $^1\text{H}$ - and  $^{13}\text{C}$ - spectra were referenced to  $\text{CHCl}_3$  ( $\delta$ : 7.26 and 77.16 ppm for  $^1\text{H}$ - and  $^{13}\text{C}$ -NMR, respectively) as an internal standard. The following abbreviations are used: s = singlet, d = doublet, m = multiplet. HRMS (ESI) spectra were recorded on Agilent 6230 Accurate-Mass TOF LC/MS system using electrospray ionization. UV/Vis spectra were recorded at room temperature on a HITACHI U-2900 spectrophotometer and fluorescence spectra on a HITACHI F-7100 spectrophotometer. The relative emission quantum yield  $\Phi_{\text{em}}$  were measured by excitation at using reference material of Oxazine 170 ( $\Phi_{\text{em}} = 58\%$  in ethanol<sup>[1]</sup>) Crystal structures were determined by the single-crystal X-ray diffraction method at  $T = 103$  K. These diffraction data were collected using Rigaku XtaLAB Synergy-i diffractometer (Cu-K $\alpha$  radiation).

### Materials

Reagents were purchased from Wako Pure Chemical Industries, Kanto Chemical Co., Inc., and Tokyo Chemical Industry Co., Ltd. All solvents were used without further purification.

### Computational Details

All calculations were carried out with the Gaussian 09<sup>[2]</sup> and Gaussian 16<sup>[3]</sup> program package. The molecular structures optimizations were conducted at the B3LYP or CAM-B3LYP level using 6-31+G\*\* or cc-pVDZ basis set for all the atoms. Excitation wavelengths and oscillator strengths were obtained at the density functional level using time-dependent perturbation theory (TDDFT) approach. Solvation was evaluated by the self-consistent reaction field (SCRF) method using the polarizable continuum model (PCM).<sup>[4]</sup> The vibrational frequencies were computed at the same level to check whether each optimized structure is an energy minimum or a transition state and to evaluate its zero-point vibrational energy and thermal corrections at 298 K.

## Reference

- [1] Rurack, K.; Spieles, M. *Anal. Chem.* **2011**, *83*, 1232–1242.
- [2]. Gaussian 09, Revision E. 01, Frisch, M. J.; Trucks, G. W.; Schlegel, H. B.; Scuseria, G. E.; Robb, M. A.; Cheeseman, J. R.; Scalmani, G.; Barone, V.; Mennucci, B.; Petersson, G. A.; Nakatsuji, H.; Caricato, M.; Li, X.; Hratchian, H. P.; Izmaylov, A. F.; Bloino, J.; Zheng, G.; Sonnenberg, J. L.; Hada, M.; Ehara, M.; Toyota, K.; Fukuda, R.; Hasegawa, J.; Ishida, M.; Nakajima, T.; Honda, Y.; Kitao, O.; Nakai, H.; Vreven, T.; Montgomery, J. A. Jr.; Peralta, J. E.; Ogliaro, F.; Bearpark, M.; Heyd, J. J.; Brothers, E.; Kudin, K. N.; Staroverov, V. N.; Keith, T.; Kobayashi, R.; Normand, J.; Raghavachari, K.; Rendell, A.; Burant, J. C.; Iyengar, S. S.; Tomasi, J.; Cossi, M.; Rega, N.; Millam, J. M.; Klene, M.; Knox, J. E.; Cross, J. B.; Bakken, V.; Adamo, C.; Jaramillo, J.; Gomperts, R.; Stratmann, R. E.; Yazyev, O.; Austin, A. J.; Cammi, R.; Pomelli, C.; Ochterski, J. W.; Martin, R. L.; Morokuma, K.; Zakrzewski, V. G.; Voth, G. A.; Salvador, P.; Dannenberg, J. J.; Dapprich, S.; Daniels, A. D.; Farkas, O.; Foresman, J. B.; Ortiz, J. V.; Cioslowski, J.; Fox, D. J. Gaussian, Inc., Wallingford CT, **2013**.
- [3]. Gaussian 16, Revision B.01, Frisch, M. J.; Trucks, G. W.; Schlegel, H. B.; Scuseria, G. E.; Robb, M. A.; Cheeseman, J. R.; Scalmani, G.; Barone, V.; Petersson, G. A.; Nakatsuji, H.; Li, X.; Caricato, M.; Marenich, A. V.; Bloino, J.; Janesko, B. G.; Gomperts, R.; Mennucci, B.; Hratchian, H. P.; Ortiz, J. V.; Izmaylov, A. F.; Sonnenberg, J. L.; Williams-Young, D.; Ding, F.; Lipparini, F.; Egidi, F.; Goings, J.; Peng, B.; Petrone, A.; Henderson, T.; Ranasinghe, D.; Zakrzewski, V. G.; Gao, J.; Rega, N.; Zheng, G.; Liang, W.; Hada, M.; Ehara, M.; Toyota, K.; Fukuda, R.; Hasegawa, J.; Ishida, M.; Nakajima, T.; Honda, Y.; Kitao, O.; Nakai, H.; Vreven, T.; Throssell, K.; Montgomery, J. A., Jr.; Peralta, J. E.; Ogliaro, F.; Bearpark, M. J.; Heyd, J. J.; Brothers, E. N.; Kudin, K. N.; Staroverov, V. N.; Keith, T. A.; Kobayashi, R.; Normand, J.; Raghavachari, K.; Rendell, A. P.; Burant, J. C.; Iyengar, S. S.; Tomasi, J.; Cossi, M.; Millam, J. M.; Klene, M.; Adamo, C.; Cammi, R.; Ochterski, J. W.; Martin, R. L.; Morokuma, K.; Farkas, O.; Foresman, J. B.; Fox, D. J. Gaussian, Inc., Wallingford CT, 2016.
- [4]. Miertuš, S.; Scrocco, E.; Tomasi, *J. Chem. Phys.* **1981**, *55*, 117-129.

## 2. Experimental Procedure

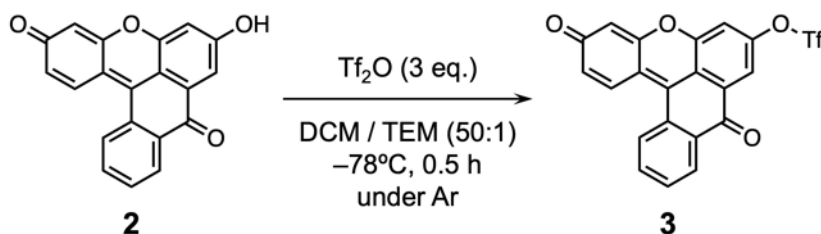

**Synthesis of 3:** **2** (100 mg, 0.301 mmol) was suspended in  $\text{CH}_2\text{Cl}_2$  (100 ml) and triethylamine (2 ml), and the mixture was stirred at room temperature for 10 minutes. After cooling the mixture to  $-78^\circ\text{C}$ , trifluoromethanesulfonic anhydride was slowly added and stirred for 0.5 h. It was subsequently diluted with water and extracted with  $\text{CH}_2\text{Cl}_2$  (2 $\times$ ). The combined organic extracts were dried ( $\text{Na}_2\text{SO}_4$ ), filtered, and concentrated in vacuo. Flash chromatography on silica gel ( $\text{CHCl}_3$ ) afforded 114 mg (79%) of **3** as a dark red solid.

**Compound 3:**  $^1\text{H}$  NMR (400 MHz,  $\text{CDCl}_3$ ):  $\delta$  8.55 (dd,  $J = 7.2$  Hz, 2.0 Hz, 1H), 8.22-8.14 (m, 2H), 8.11 (d,  $J = 2.0$  Hz, 1H), 7.94-7.85 (m, 2H), 7.65 (d,  $J = 2.8$  Hz, 1H), 7.00 (dd,  $J = 10.0$  Hz, 2.0 Hz, 1H), 6.68 (d,  $J = 2.0$  Hz, 1H).  $^{13}\text{C}$  NMR (100 MHz,  $\text{CDCl}_3$ ):  $\delta$  184.9, 180.3, 159.0, 151.9, 151.6, 133.9, 133.4, 133.0, 132.0, 131.6, 131.1, 130.8, 129.8, 122.8, 119.4, 116.9, 114.5, 107.7; HRMS (ESI, positive)  $m/z$  calcd. for  $\text{C}_{21}\text{H}_{10}\text{F}_3\text{O}_6\text{S}$  ( $\text{M}+\text{H}$ ) $^+$ : 447.0150, found: 447.0155.

### General procedure for synthesis of BRO (1a–1c)

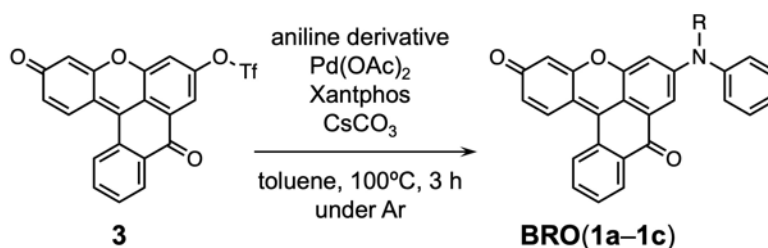

**1a~1c** were synthesized from **3** according to the reported procedure<sup>[1]</sup>. A Schlenk flask was charged with **2** (100 mg), Pd(OAc)<sub>2</sub> (10 mg, 0.2 eq), BINAP (45 mg, 0.3 eq), and Cs<sub>2</sub>CO<sub>3</sub> (119 mg, 2.8 eq). The Schlenk flask was sealed and evacuated/backfilled with argon (3×). Toluene (1 mL) was added, and the reaction was flushed again with nitrogen (3×). aniline derivatives (2.4 eq) were then added. The reaction was stirred at 100°C for 3 h. It was subsequently cooled to room temperature and purified by silica gel chromatography (CH<sub>2</sub>Cl<sub>2</sub>/MeOH, 100:0~50:1).

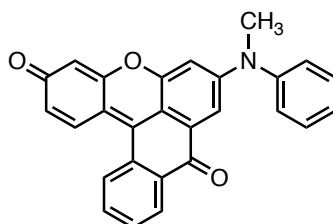

Compound **1a** (black powder): <sup>1</sup>H NMR (500 MHz, CDCl<sub>3</sub>): δ 8.37 (d, *J* = 7.0 Hz, 1H), 8.11 (d, *J* = 7.5 Hz, 1H), 8.01 (d, *J* = 10 Hz, 1H), 7.80–7.68 (m, 2H), 7.58–7.47 (m, 3H), 7.38 (t, *J* = 7.5 Hz, 1H), 7.29 (d, *J* = 8.0 Hz, 2H), 6.87 (d, *J* = 9.5 Hz, 1H), 6.78 (d, *J* = 2.5 Hz, 1H), 6.60 (s, 1H), 3.52 (s, 3H); <sup>13</sup>C NMR (125 MHz, CDCl<sub>3</sub>): δ 182.0, 159.5, 153.4, 153.2, 145.7, 133.5, 133.2, 132.3, 131.4, 130.6, 130.4, 129.5, 129.2, 127.6, 126.7, 117.0, 111.3, 110.5, 106.4, 103.2, 41.1; HRMS (ESI, positive) *m/z* calcd. for C<sub>27</sub>H<sub>18</sub>NO<sub>3</sub> (M+H)<sup>+</sup>: 404.1287, found: 404.1282.

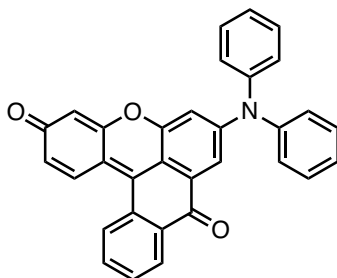

Compound **1b** (black powder):  $^1\text{H}$  NMR (500 MHz,  $\text{CDCl}_3$ ):  $\delta$  8.41 (dd,  $J = 7.5$  Hz, 1.0 Hz, 1H), 8.18 (d,  $J = 8.0$  Hz, 1H), 8.07 (d,  $J = 9.5$  Hz, 1H), 7.83-7.71 (m, 3H), 7.41 (t,  $J = 7.5$  Hz, 4H), 7.27 (t,  $J = 7.5$  Hz, 2H), 7.23 (d,  $J = 7.5$  Hz, 4H), 7.05 (d,  $J = 3.0$  Hz, 1H), 6.85 (d,  $J = 10$  Hz, 1H), 6.51 (s, 1H);  $^{13}\text{C}$  NMR (100 MHz,  $\text{CDCl}_3$ ):  $\delta$  182.0, 159.5, 153.0, 152.6, 145.2, 133.6, 133.2, 132.4, 131.5, 131.5, 130.5, 130.3, 130.2, 129.8, 129.3, 126.7, 126.5, 118.5, 115.5, 112.3, 108.8, 106.8; HRMS (ESI, positive)  $m/z$  calcd. for  $\text{C}_{32}\text{H}_{20}\text{NO}_3$  ( $\text{M}+\text{H}$ ) $^+$ : 464.1443, found: 466.1448.

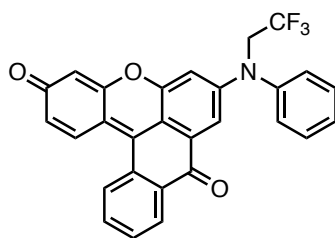

Compound **1c** (black powder):  $^1\text{H}$  NMR (500 MHz,  $\text{CDCl}_3$ ):  $\delta$  8.39 (d,  $J = 7.0$  Hz, 1H), 8.09 (d,  $J = 7.5$  Hz, 1H), 7.99 (d,  $J = 9.0$  Hz, 1H), 7.82-7.67 (m, 2H), 7.63-7.50 (m, 3H), 7.44 (t,  $J = 7.5$  Hz, 1H), 7.33 (d,  $J = 7.5$  Hz, 2H), 6.83-6.73 (m, 2H), 6.45 (s, 1H), 4.47 (q,  $J = 8.0$  Hz, 2H);  $^{13}\text{C}$  NMR (125 MHz,  $\text{CDCl}_3$ ):  $\delta$  181.8, 159.3, 152.7, 152.3, 144.3, 133.4, 133.1, 132.2, 131.3, 131.0, 130.6, 130.3, 129.7, 129.2, 128.5, 127.8, 125.8, 123.6, 118.8, 111.6, 110.3, 106.9, 105.2, 54.2, 53.9; HRMS (ESI, positive)  $m/z$  calcd. for  $\text{C}_{28}\text{H}_{17}\text{F}_3\text{NO}_3$  ( $\text{M}+\text{H}$ ) $^+$ : 472.1160, found: 472.1156.

## Reference

[1] Grimm, J. B.; Lavis, L. D. *Org. Lett.* **2011**, *13*, 6354–6357.

### 3. Single X-ray Structure Analysis

Single crystals of **1a**, **1b**, and **1c** were obtained by slow diffusion of Et<sub>2</sub>O into a CHCl<sub>3</sub> solution of **1a**, **1b**, and **1c** at 10°C. These crystal structures were determined by the single-crystal X-ray diffraction method at T = 103 K. The diffraction data were collected using Rigaku XtaLAB Synergy-i diffractometer (Cu-K $\alpha$  radiation). The structure was solved using the SHELXT<sup>[1]</sup> and refined with SHELXL-2018/3<sup>[2]</sup> via OLEX2<sup>[3]</sup>. All non-hydrogen atoms were refined anisotropically. All the hydrogen atoms were put on calculated geometrically, and were refined by applying riding models. Crystal data, structure refinement and included solvents are summarized in **Table S1-S3**. Crystallographic data have been deposited with the Cambridge Crystallographic Data Centre: Deposition code CCDC 2332061 (**1a**); 2332062 (**1b**); and 2332063 (**1c**).



**Table S1** Crystal data and structure refinement for **1a**.

| <b>1a</b>                                           |                                                 |
|-----------------------------------------------------|-------------------------------------------------|
| Chemical formula                                    | C <sub>27</sub> H <sub>17</sub> NO <sub>3</sub> |
| Recrystallization solvent                           | CHCl <sub>3</sub> / Et <sub>2</sub> O           |
| Included solvent                                    | –                                               |
| Crystal system                                      | Orthorhombic                                    |
| Space group [No.]                                   | <i>Pbc</i> a [61]                               |
| Crystal color, habit                                | Metallic black, plate                           |
| Crystal size, mm                                    | 0.309 × 0.050 × 0.020                           |
| <i>a</i> , Å                                        | 7.3843(2)                                       |
| <i>b</i> , Å                                        | 20.0427(5)                                      |
| <i>c</i> , Å                                        | 24.5666(6)                                      |
| $\alpha$ , °                                        | 90                                              |
| $\beta$ , °                                         | 90                                              |
| $\gamma$ , °                                        | 90                                              |
| Volume, Å <sup>3</sup>                              | 3635.89(16)                                     |
| <i>Z</i>                                            | 8                                               |
| <i>D</i> <sub>calcd</sub> , g/cm <sup>3</sup>       | 1.474                                           |
| <i>T</i> , K                                        | 103.15                                          |
| Radiation                                           | Cu K $\alpha$                                   |
| <i>M</i> , mm <sup>-1</sup>                         | 0.775                                           |
| $2\theta_{max}$ , °                                 | 67.6560                                         |
| <i>F</i> (000)                                      | 1680                                            |
| Reflns collected                                    | 3292                                            |
| Unique reflns                                       | 2655                                            |
| No. of parameters                                   | 281                                             |
| <i>R</i> 1 ( <i>I</i> > 2.00 $\sigma$ ( <i>i</i> )) | 0.0527                                          |
| <i>R</i> (all reflection)                           | 0.0663                                          |
| GOF                                                 | 1.026                                           |

**Table S2** Crystal data and structure refinement for **1b**.

| <b>1b</b>                                           |                                                 |
|-----------------------------------------------------|-------------------------------------------------|
| Chemical formula                                    | C <sub>32</sub> H <sub>19</sub> NO <sub>3</sub> |
| Recrystallization solvent                           | CHCl <sub>3</sub> / Et <sub>2</sub> O           |
| Included solvent                                    | –                                               |
| Crystal system                                      | Orthorhombic                                    |
| Space group [No.]                                   | <i>P b c a</i> [61]                             |
| Crystal color, habit                                | Metallic black, plate                           |
| Crystal size, mm                                    | 0.939 × 0.314 × 0.061                           |
| <i>a</i> , Å                                        | 7.75825(12)                                     |
| <i>b</i> , Å                                        | 18.8157(4)                                      |
| <i>c</i> , Å                                        | 31.7145(6)                                      |
| $\alpha$ , °                                        | 90                                              |
| $\beta$ , °                                         | 90                                              |
| $\gamma$ , °                                        | 90                                              |
| Volume, Å <sup>3</sup>                              | 4629.59(14)                                     |
| <i>Z</i>                                            | 8                                               |
| <i>D</i> <sub>calcd</sub> , g/cm <sup>3</sup>       | 1.336                                           |
| <i>T</i> , K                                        | 103.15                                          |
| Radiation                                           | Cu K $\alpha$                                   |
| <i>M</i> , mm <sup>-1</sup>                         | 0.687                                           |
| $2\theta_{max}$ , °                                 | 68.1400                                         |
| <i>F</i> (000)                                      | 1936                                            |
| Reflns collected                                    | 4249                                            |
| Unique reflns                                       | 3827                                            |
| No. of parameters                                   | 326                                             |
| <i>R</i> 1 ( <i>I</i> > 2.00 $\sigma$ ( <i>i</i> )) | 0.0387                                          |
| <i>R</i> (all reflection)                           | 0.0426                                          |
| GOF                                                 | 1.027                                           |

**Table S3** Crystal data and structure refinement for **1c**.

| <b>1c</b>                                           |                                                                |
|-----------------------------------------------------|----------------------------------------------------------------|
| Chemical formula                                    | C <sub>28</sub> H <sub>16</sub> F <sub>3</sub> NO <sub>3</sub> |
| Recrystallization solvent                           | CHCl <sub>3</sub> / Et <sub>2</sub> O                          |
| Included solvent                                    | –                                                              |
| Crystal system                                      | Triclinic                                                      |
| Space group [No.]                                   | <i>P</i> -1 [2]                                                |
| Crystal color, habit                                | Metallic black, plate                                          |
| Crystal size, mm                                    | 0.313 × 0.247 × 0.216                                          |
| <i>a</i> , Å                                        | 10.9940(3)                                                     |
| <i>b</i> , Å                                        | 11.0404(3)                                                     |
| <i>c</i> , Å                                        | 17.6631(4)                                                     |
| $\alpha$ , °                                        | 83.512(2)                                                      |
| $\beta$ , °                                         | 80.770(2)                                                      |
| $\gamma$ , °                                        | 72.972(3)                                                      |
| Volume, Å <sup>3</sup>                              | 2018.43(10)                                                    |
| <i>Z</i>                                            | 2                                                              |
| <i>D</i> <sub>calcd</sub> , g/cm <sup>3</sup>       | 1.551                                                          |
| <i>T</i> , K                                        | 103.15                                                         |
| Radiation                                           | Cu K $\alpha$                                                  |
| <i>M</i> , mm <sup>-1</sup>                         | 1.012                                                          |
| $2\theta_{max}$ , °                                 | 67.9470                                                        |
| <i>F</i> (000)                                      | 452                                                            |
| Reflns collected                                    | 7344                                                           |
| Unique reflns                                       | 6165                                                           |
| No. of parameters                                   | 631                                                            |
| <i>R</i> 1 ( <i>I</i> > 2.00 $\sigma$ ( <i>i</i> )) | 0.0527                                                         |
| <i>R</i> (all reflection)                           | 0.0600                                                         |
| GOF                                                 | 1.022                                                          |

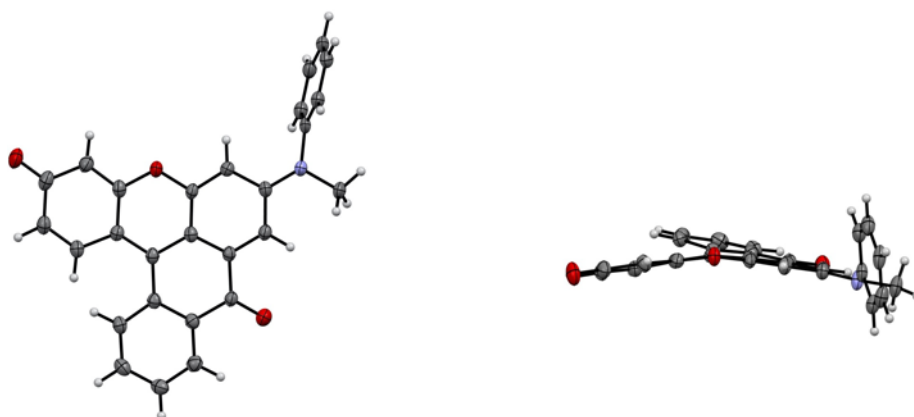

**Fig. S1** Top and side views of the X-ray crystal structure for **1a**. The thermal ellipsoids are scaled to the 50% probability level.

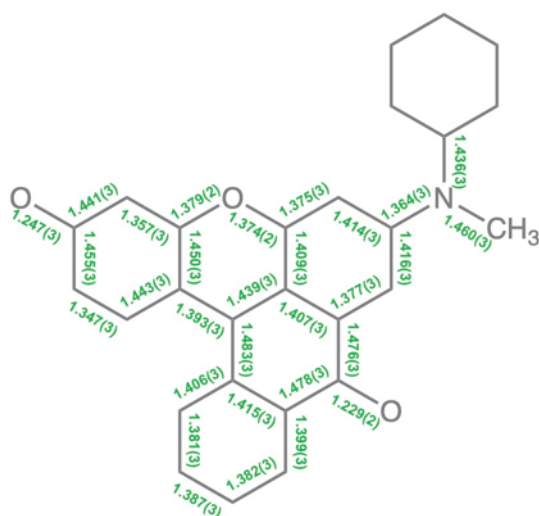

**Fig. S2** Bond length (Å) obtained from X-ray crystallographic analysis of **1a**.

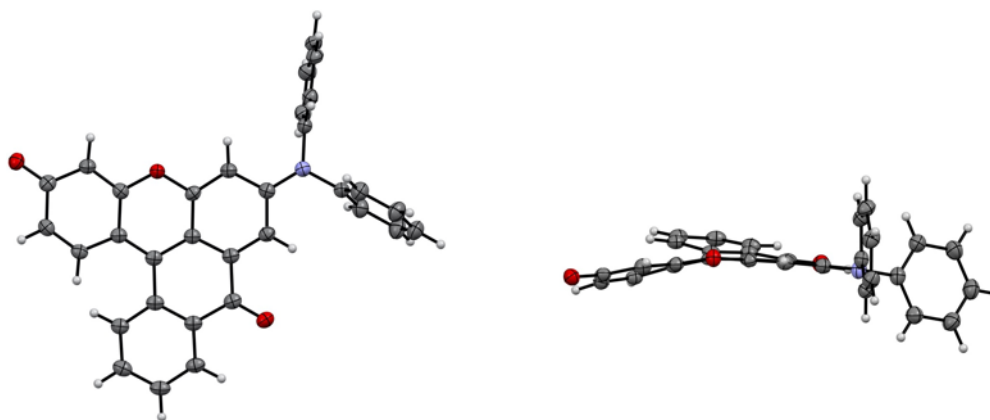

**Fig. S3** Top and side views of the X-ray crystal structure for **1b**. The thermal ellipsoids are scaled to the 50% probability level.

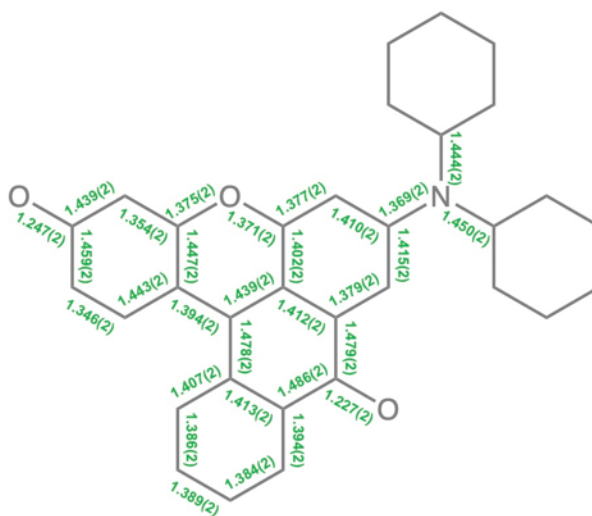

**Fig. S4** Bond length (Å) obtained from X-ray crystallographic analysis of **1b**.

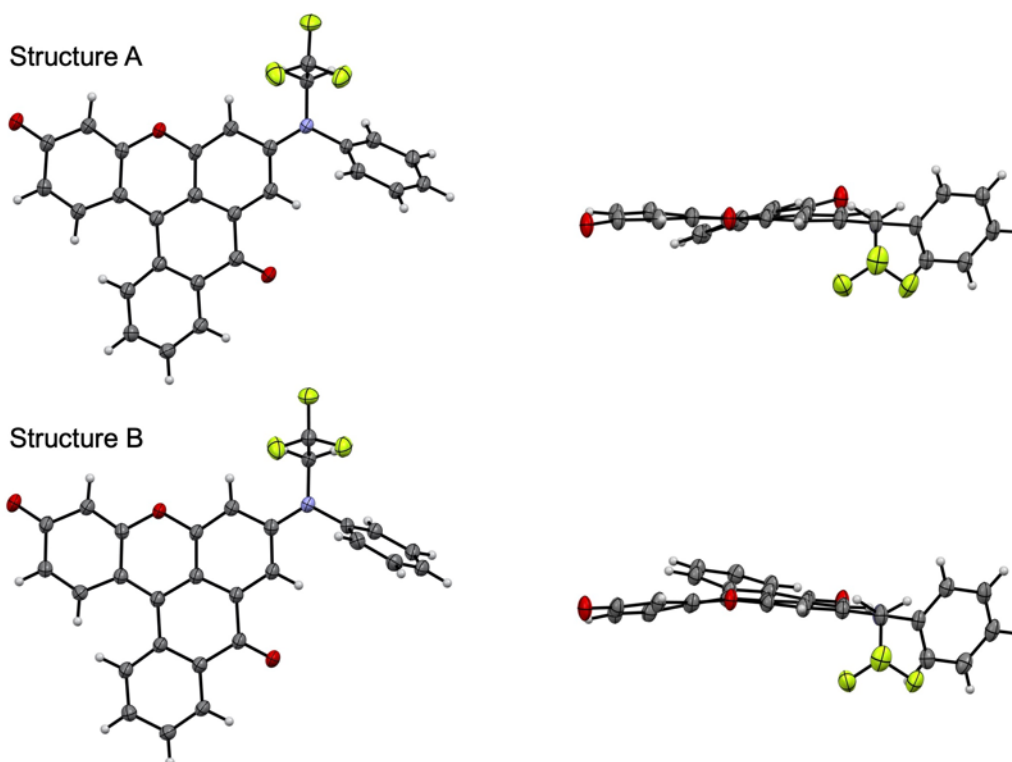

**Fig. S5** Top and side views of the X-ray crystal structure for **1c**. The thermal ellipsoids are scaled to the 50% probability level.

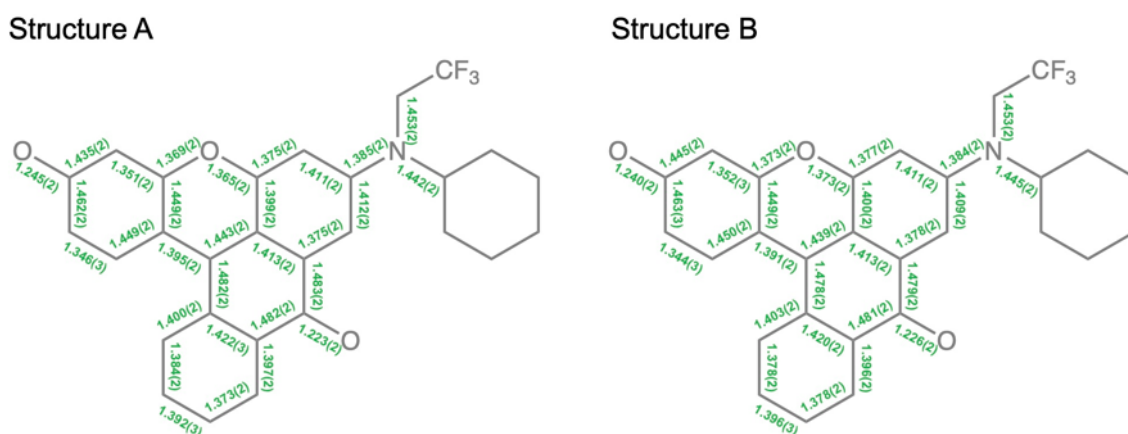

**Fig. S6** Bond length (Å) obtained from X-ray crystallographic analysis of **1c**.

## Reference

- [1] Sheldrick, G. M. *Acta Cryst.* **2015**, *A71*, 3–8.
- [2] Sheldrick, G. M. *Acta Cryst.* **2015**, *C71*, 3–8.
- [3] Dolomanov O. V.; Bourhis, L. J.; Gildea, R. J.; Howard, J. A. K.; Puschmann. H. J. *Appl. Cryst.* **2009**, *42*, 339–341.

#### 4. Optical Properties and DFT calculation

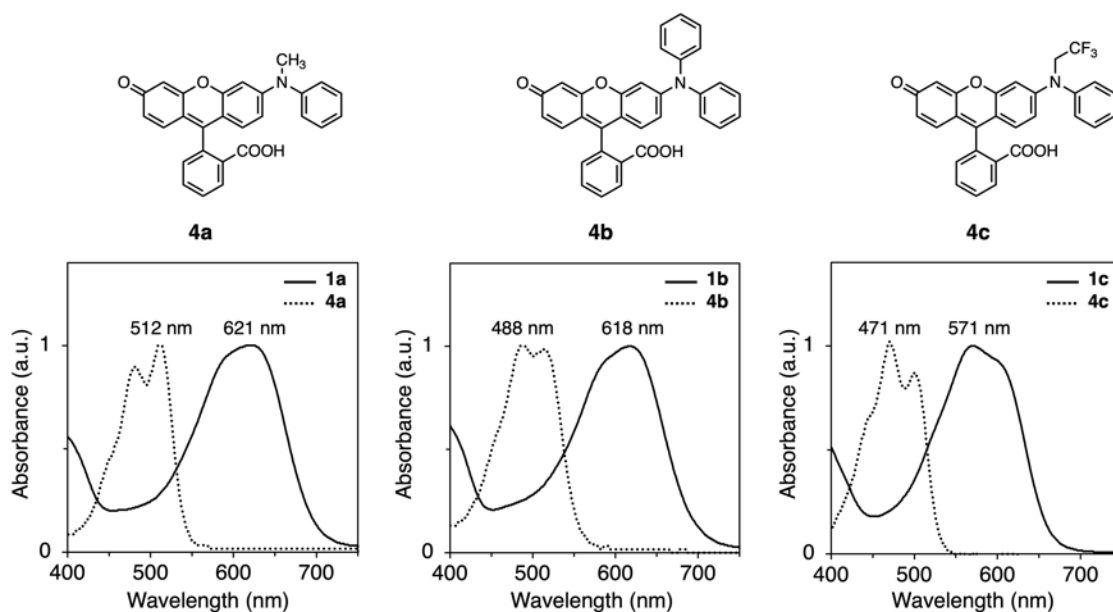

**Fig. S7** Comparison of absorption spectra of **Rhodol (4a–4c)** and **BRO (1a–1c)** in DMSO.

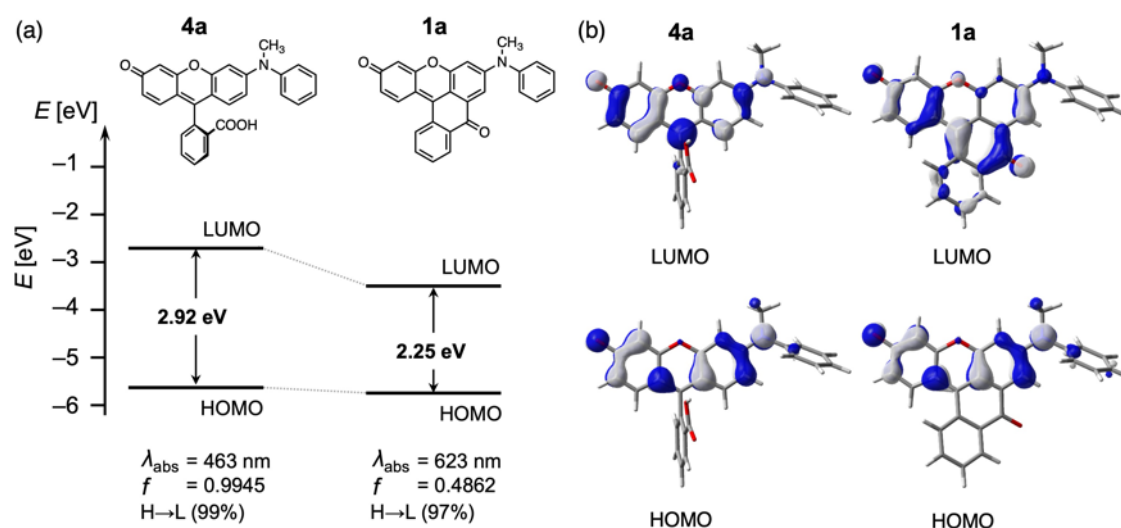

**Fig. S8** Energy diagrams and frontier molecular orbitals of **4a** and **1a**. Calculations were performed at B3LYP/6-31+G\*\* level in the gas phase.



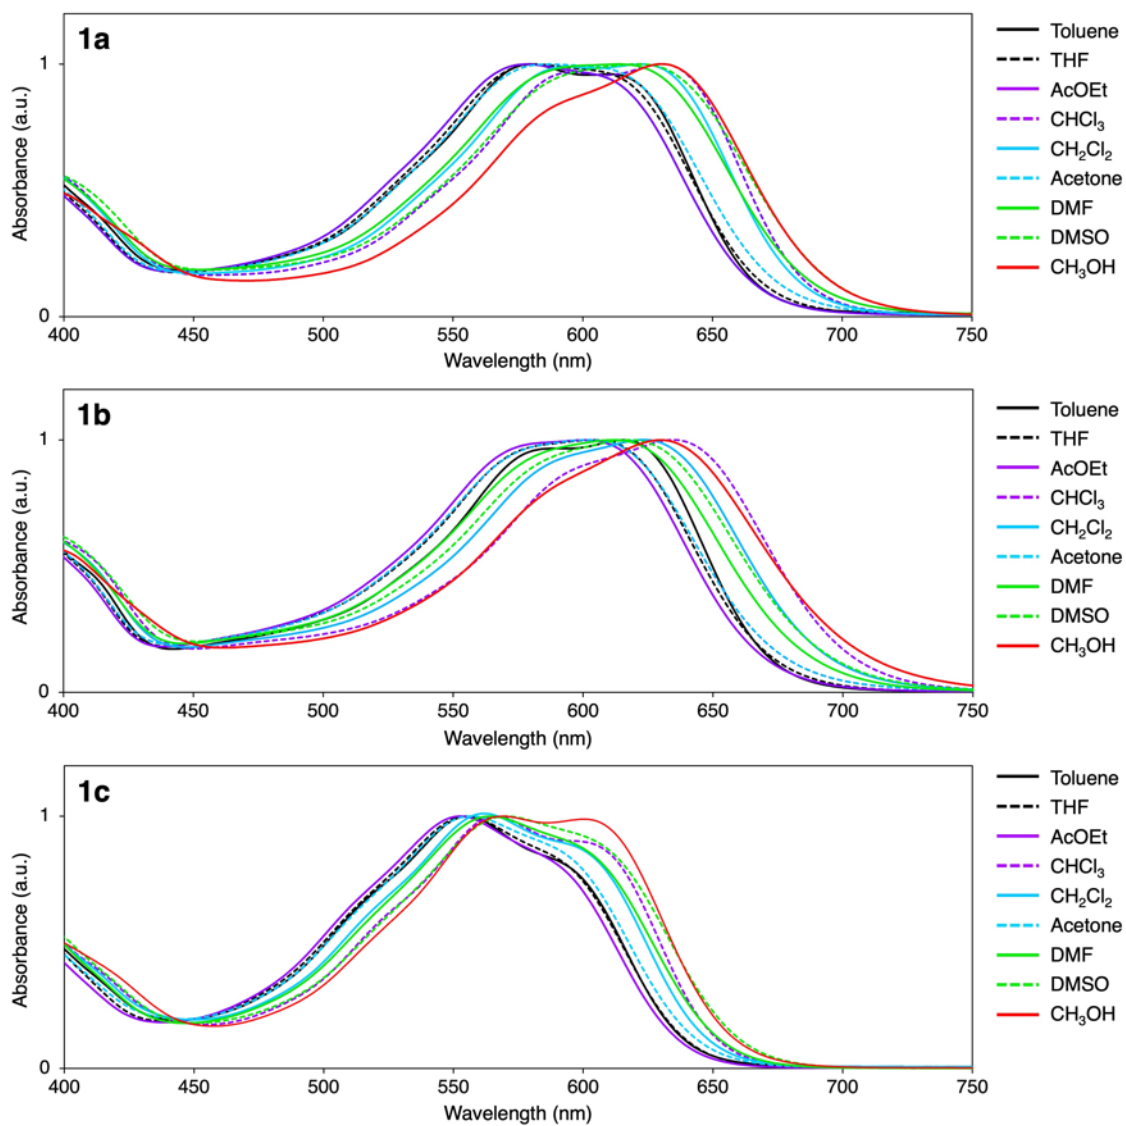

**Fig. S9** Absorption spectra of **1a–1c** in various organic solvents.

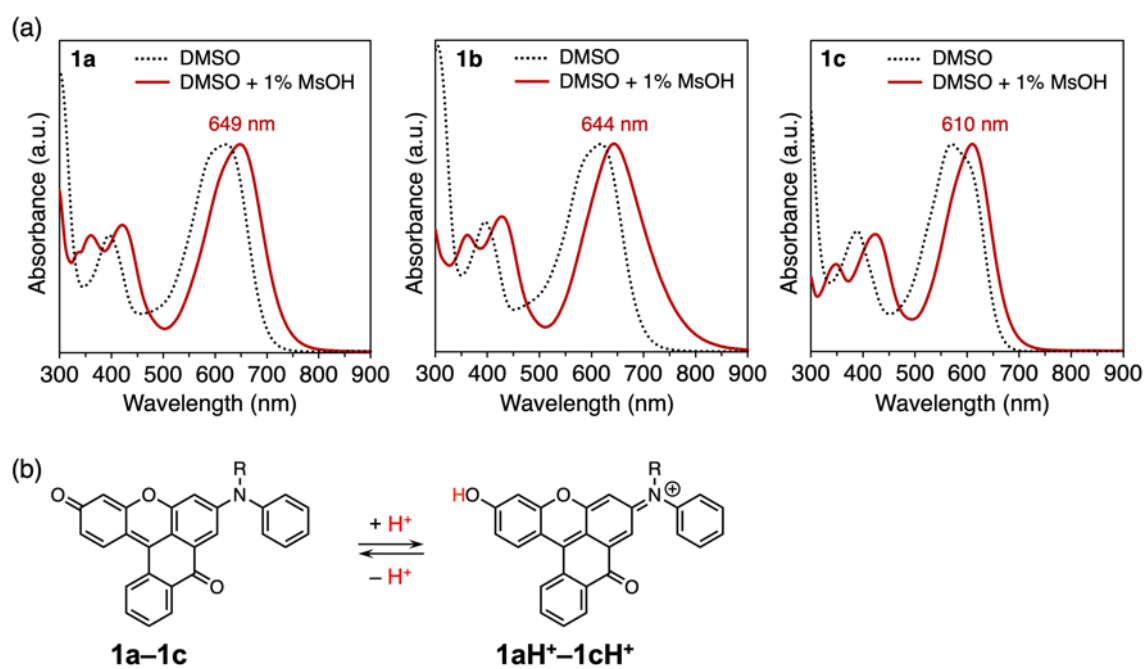

**Fig. S10** Absorption spectra of **1a–1c** in DMSO containing 1% MsOH.

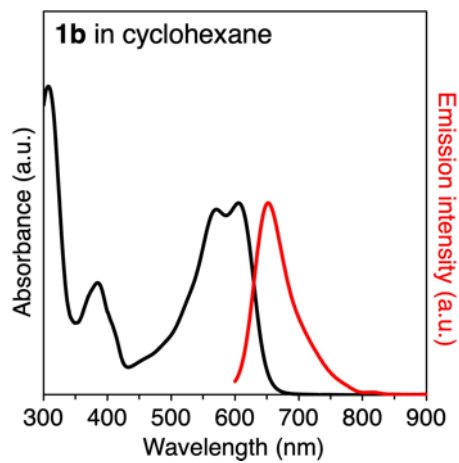

**Fig. S11** Absorption and emission spectra of **1b** in cyclohexane.  $\lambda_{\text{ex}} = 400$  nm.

**Table S4** Optical properties of **1a** in organic solvents.

| Solvent                         | Solvent polarity parameters |                               | $\lambda_{\text{abs}}$<br>[nm] | $\lambda_{\text{fl}}$<br>[nm] | $\varepsilon$<br>[cm <sup>-1</sup> M <sup>-1</sup> ] | $\Phi_{\text{em}}$ <sup>*2</sup><br>[%] |
|---------------------------------|-----------------------------|-------------------------------|--------------------------------|-------------------------------|------------------------------------------------------|-----------------------------------------|
|                                 | $E_{\text{T}}(30)$          | $\varepsilon_r$ <sup>*1</sup> |                                |                               |                                                      |                                         |
| Toluene                         | 33.9                        | 2.4                           | 580                            | 671                           | 14000                                                | 2.9                                     |
| Benzene                         | 34.3                        | 2.3                           | 623                            | 674                           | 14000                                                | 1.4                                     |
| THF                             | 37.9                        | 7.6                           | 580                            | 674                           | 20000                                                | < 0.1                                   |
| AcOEt                           | 38.1                        | 6.0                           | 579                            | 669                           | 14000                                                | < 0.1                                   |
| CHCl <sub>3</sub>               | 39.1                        | 4.8                           | 630                            | 689                           | 23000                                                | < 0.1                                   |
| CH <sub>2</sub> Cl <sub>2</sub> | 40.7                        | 9.1                           | 622                            | 687                           | 23000                                                | < 0.1                                   |
| Acetone                         | 42.2                        | 20.6                          | 590                            | 590                           | 13000                                                | < 0.1                                   |
| DMF                             | 43.2                        | 36.7                          | 613                            | n.d.                          | 23000                                                | n.d.                                    |
| DMSO                            | 45.1                        | 46.5                          | 622                            | n.d.                          | 22000                                                | n.d.                                    |
| CH <sub>3</sub> OH              | 55.4                        | 32.7                          | 630                            | n.d.                          | 19000                                                | n.d.                                    |

\*1 The dielectric constant ( $\varepsilon_r$ ) was measured at 25°C. \*2 The relative emission quantum yield  $\Phi_{\text{em}}$  was measured by excitation at using reference material of Oxazine 170 ( $\Phi_{\text{em}} = 58\%$  in ethanol<sup>[1]</sup>).  $\lambda_{\text{ex}} = 400$  nm.

**Table S5** Optical properties of **1b** in organic solvents.

| Solvent                         | Solvent polarity parameters |                               | $\lambda_{\text{abs}}$<br>[nm] | $\lambda_{\text{fl}}$<br>[nm] | $\varepsilon$<br>[cm <sup>-1</sup> M <sup>-1</sup> ] | $\Phi_{\text{em}}$ <sup>*2</sup><br>[%] |
|---------------------------------|-----------------------------|-------------------------------|--------------------------------|-------------------------------|------------------------------------------------------|-----------------------------------------|
|                                 | $E_{\text{T}}(30)$          | $\varepsilon_r$ <sup>*1</sup> |                                |                               |                                                      |                                         |
| Cyclohexane                     | 30.9                        | 2.0                           | 606                            | 652                           | — <sup>*3</sup>                                      | 1.8                                     |
| Toluene                         | 33.9                        | 2.4                           | 615                            | 681                           | 20000                                                | 5.3                                     |
| Benzene                         | 34.3                        | 2.3                           | 617                            | 690                           | 21000                                                | 3.9                                     |
| THF                             | 37.9                        | 7.6                           | 606                            | 668                           | 23000                                                | < 0.1                                   |
| AcOEt                           | 38.1                        | 6.0                           | 602                            | 679                           | 21000                                                | < 0.1                                   |
| CHCl <sub>3</sub>               | 39.1                        | 4.8                           | 633                            | 716                           | 25000                                                | < 0.1                                   |
| CH <sub>2</sub> Cl <sub>2</sub> | 40.7                        | 9.1                           | 623                            | 713                           | 23000                                                | < 0.1                                   |
| Acetone                         | 42.2                        | 20.6                          | 605                            | n.d.                          | 20000                                                | n.d.                                    |
| DMF                             | 43.2                        | 36.7                          | 610                            | n.d.                          | 22000                                                | n.d.                                    |
| DMSO                            | 45.1                        | 46.5                          | 617                            | n.d.                          | 21000                                                | n.d.                                    |
| CH <sub>3</sub> OH              | 55.4                        | 32.7                          | 630                            | n.d.                          | 23000                                                | n.d.                                    |

\*1 The dielectric constant ( $\varepsilon_r$ ) was measured at 25°C. \*2 The relative emission quantum yield  $\Phi_{\text{em}}$  was measured by excitation at using reference material of Oxazine 170 ( $\Phi_{\text{em}} = 58\%$  in ethanol<sup>[1]</sup>).  $\lambda_{\text{ex}} = 400$  nm. \*3 An accurate value could not be determined due to low solubility

**Table S6** Optical properties of **1c** in organic solvents.

| Solvent                         | Solvent polarity parameters |                   | $\lambda_{\text{abs}}$<br>[nm] | $\lambda_{\text{fl}}$<br>[nm] | $\epsilon$<br>[cm <sup>-1</sup> M <sup>-1</sup> ] | $\Phi_{\text{em}}^{*2}$<br>[%] |
|---------------------------------|-----------------------------|-------------------|--------------------------------|-------------------------------|---------------------------------------------------|--------------------------------|
|                                 | $E_{\text{T}}(30)$          | $\epsilon_r^{*1}$ |                                |                               |                                                   |                                |
| Toluene                         | 33.9                        | 2.4               | 555                            | 645                           | 14000                                             | 1.3                            |
| Benzene                         | 34.3                        | 2.3               | 557                            | 645                           | 13000                                             | 1.9                            |
| THF                             | 37.9                        | 7.6               | 555                            | 652                           | 17000                                             | 1.4                            |
| AcOEt                           | 38.1                        | 6.0               | 552                            | 647                           | 19000                                             | 1.6                            |
| CHCl <sub>3</sub>               | 39.1                        | 4.8               | 566                            | 656                           | 24000                                             | 3.2                            |
| CH <sub>2</sub> Cl <sub>2</sub> | 40.7                        | 9.1               | 562                            | 654                           | 25000                                             | 2.5                            |
| Acetone                         | 42.2                        | 20.6              | 560                            | 653                           | 21000                                             | 0.4                            |
| DMF                             | 43.2                        | 36.7              | 564                            | 668                           | 22000                                             | 0.3                            |
| DMSO                            | 45.1                        | 46.5              | 570                            | 675                           | 23000                                             | 0.4                            |
| CH <sub>3</sub> OH              | 55.4                        | 32.7              | 569                            | 663                           | 18000                                             | 0.1                            |

\*1 The dielectric constant ( $\epsilon_r$ ) was measured at 25°C. \*2 The relative emission quantum yield  $\Phi_{\text{em}}$  was measured by excitation at using reference material of Oxazine 170 ( $\Phi_{\text{em}} = 58\%$  in ethanol<sup>[1]</sup>).  $\lambda_{\text{ex}} = 400$  nm.

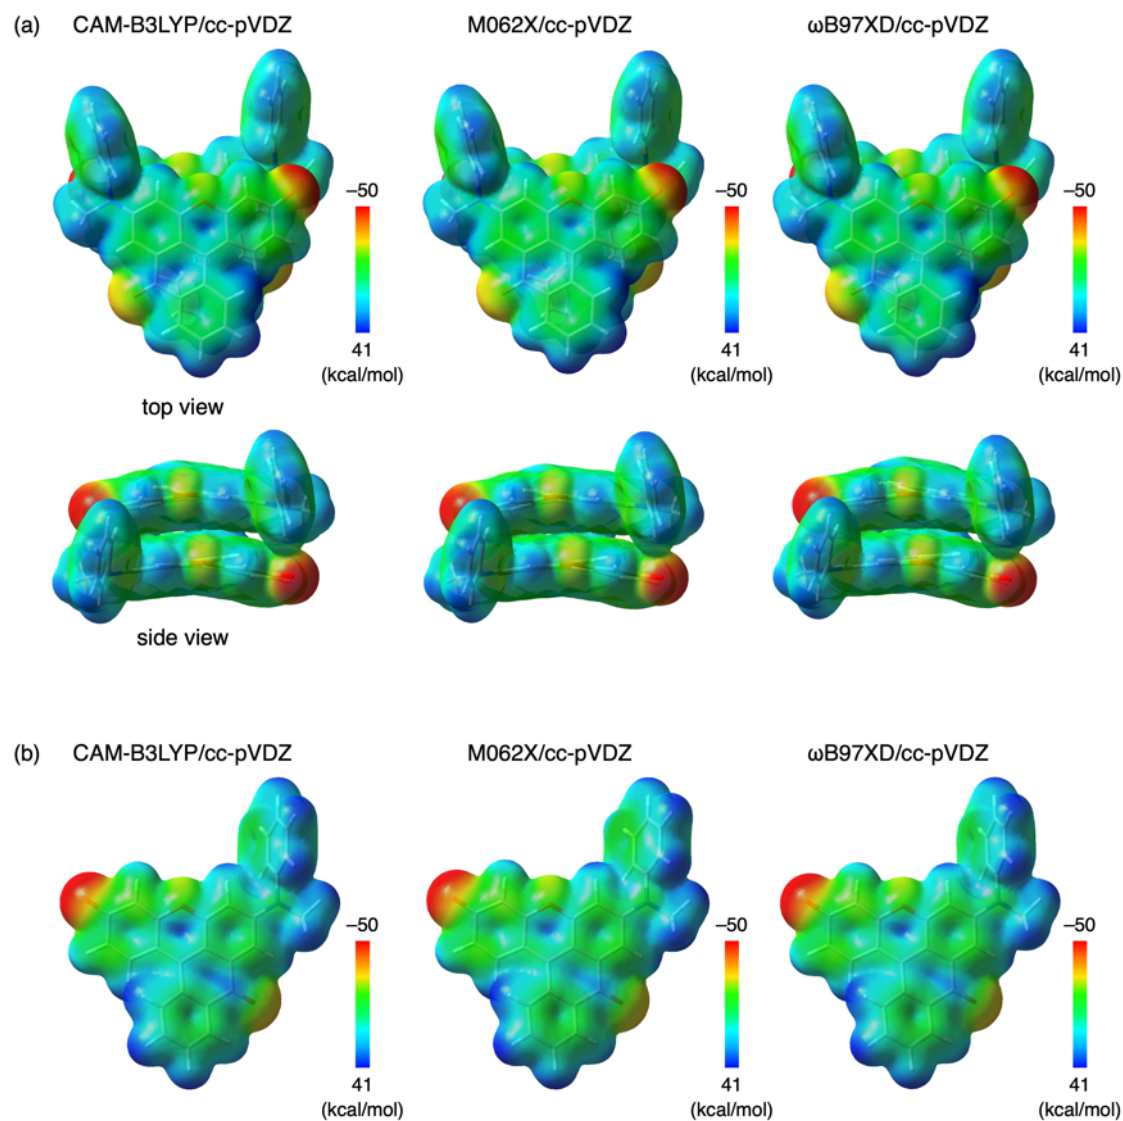

**Fig. S12** Comparison of functionals in the calculation of Electrostatic potential (ESP) distribution. All ESP surfaces were generated at an isodensity value of  $5 \times 10^{-3}$  electron per Bohr<sup>3</sup>. (a) ESP distribution of dimeric structure of **1a** in the crystal packing structure. (b) ESP distribution of the optimized structure of **1a**.

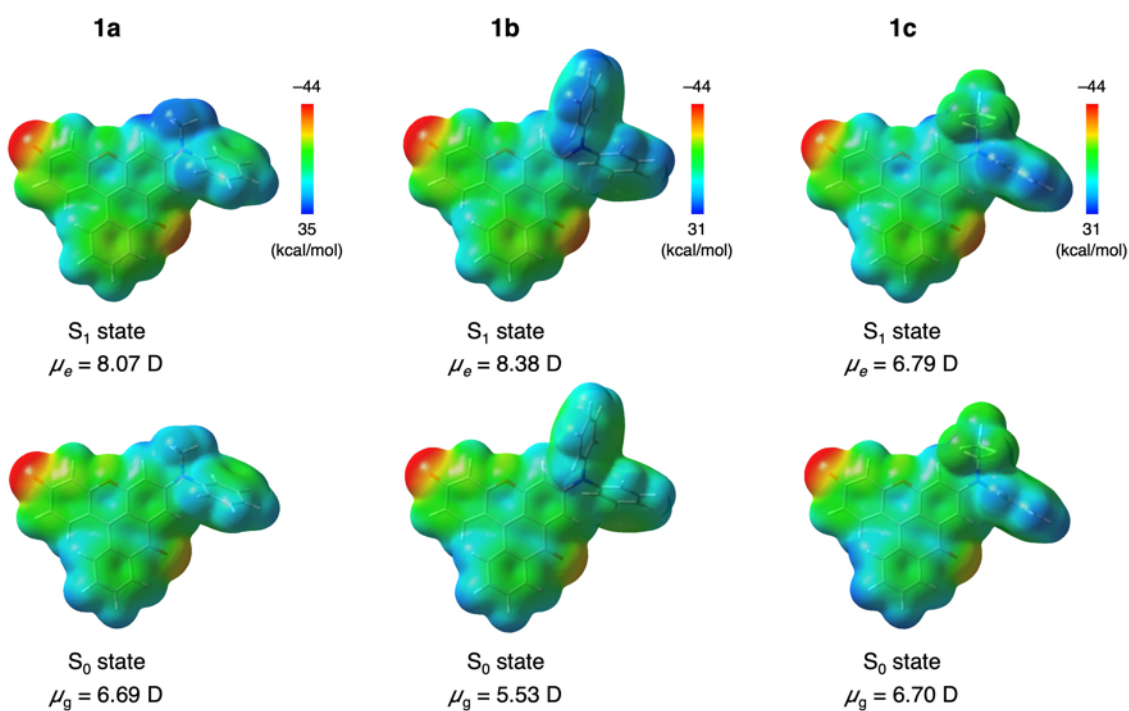

**Fig. S13** Electrostatic potential (ESP) distribution of **1a–1c** in the  $S_0$  and  $S_1$  states. ESP surfaces were generated at an isodensity value of  $1.5 \times 10^{-3}$  electron per Bohr<sup>3</sup>.  $\mu_g$  and  $\mu_e$  are the calculated dipole moments in the  $S_0$  and  $S_1$  states. All calculations were performed at (TD) CAM-B3LYP/cc-pVDZ level in the gas phase.

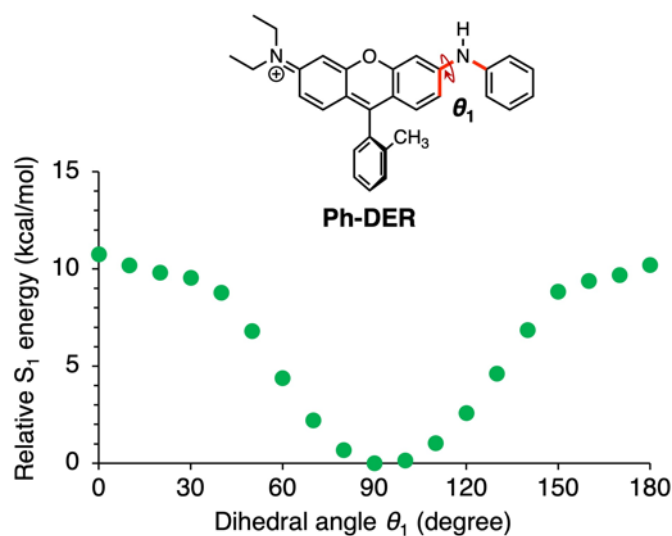

**Fig. S14** The energy profile of the  $S_1$  state of **Ph-DER** as a function of dihedral angle  $\theta_1$ . Geometries were optimized at the TD-CAM-B3LYP/cc-pVDZ level in the gas phase.

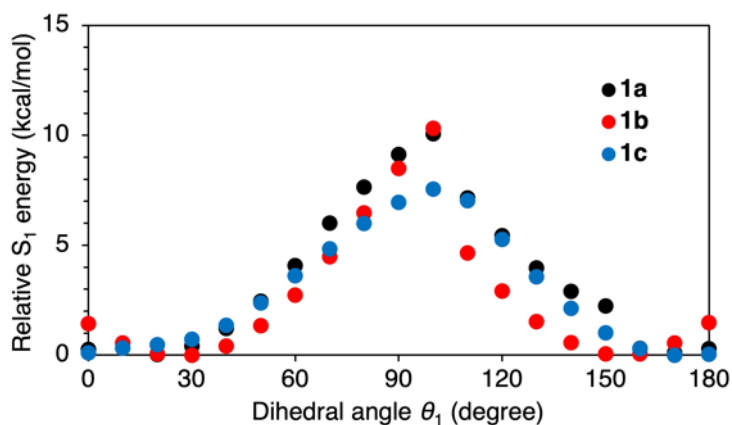

**Fig. S15** The energy profile of the  $S_1$  state of **1a–1c** in MeOH as a function of dihedral angle  $\theta_1$ . Geometries were optimized at the TD-CAM-B3LYP/cc-pVDZ level PCM (MeOH).

## Reference

[1] Rurack, K.; Spieles, M. *Anal. Chem.* **2011**, *83*, 1232–1242.

## **5. Gas Sensor and Time-dependent Security Ink by utilizing the NPSE**

### **Preparation method for gas sensing film (Fig 4)**

Polystyrene (500 mg) was dissolved in a **BRO**-containing (1 mg/ 10 mL) toluene solution (2 mL). After coating this solution to a glass plate, the toluene solvent was removed by vacuum drying at room temperature.

### **Preparation method for time-dependent security ink (Fig. 5 and Fig S16)**

Polystyrene (500 mg) and additive (emission quencher, 0.2 mL) were dissolved in a **1b**-containing (1 mg/ 10 mL)  $\text{CH}_2\text{Cl}_2$  solution (2 mL). These solutions were applied to a glass plate. It should be noted that the polystyrene solution and quencher (2-hexanone and cyclohexanone) were somewhat difficult to mix. After mixing, the solution was allowed to stand in the dark for two days to ensure that it was a completely homogeneous solution before it was used in the experiment.



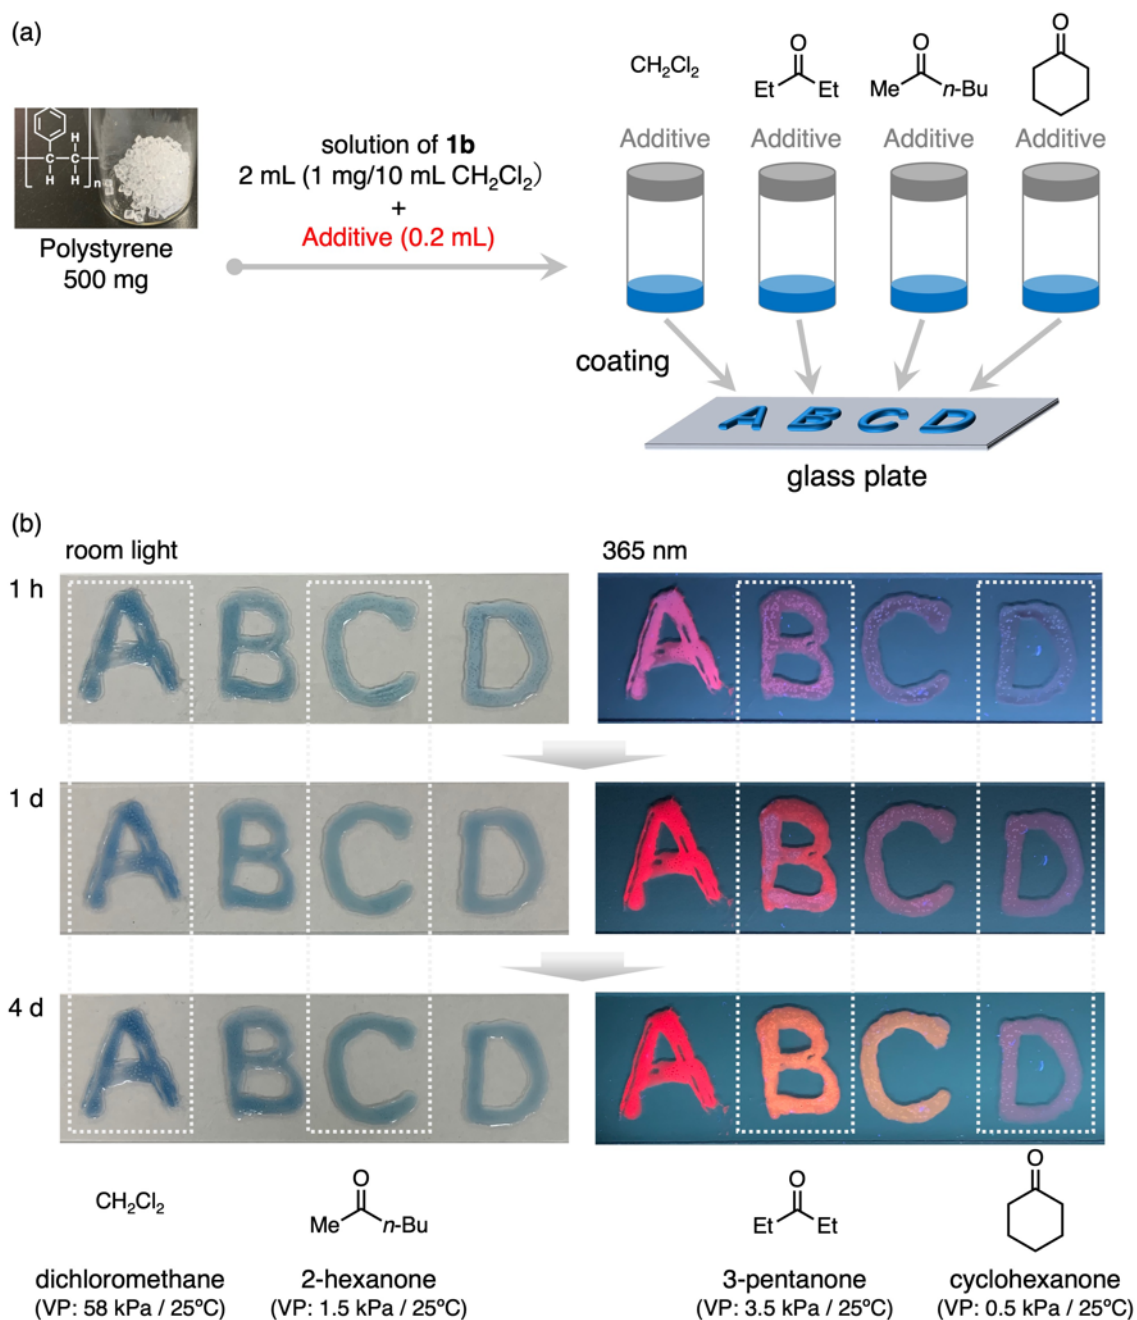

**Fig. S16** (a) Method for preparing a **1b** doped polymer films. (b) Relationship between emission of **1b** doped films and additives. VP = vapor pressure. These experiments were performed in the dark at 20°C.

## 6. NMR Spectra of Compounds

$^1\text{H}$ - and  $^{13}\text{C}$ -NMR spectra were recorded on JEOL ECZ 400S spectrometer (400 MHz for  $^1\text{H}$ -NMR and 100 MHz for  $^{13}\text{C}$ -NMR) and JEOL ECA 500 spectrometer (500 MHz for  $^1\text{H}$ -NMR and 125 MHz for  $^{13}\text{C}$ -NMR).  $^1\text{H}$ - and  $^{13}\text{C}$ - spectra were referenced to  $\text{CHCl}_3$  ( $\delta$ : 7.26 and 77.16 ppm for  $^1\text{H}$ - and  $^{13}\text{C}$ -NMR, respectively) as an internal standard. The NMR spectra of compounds **3** and **1a-1c** were measured after purification by silica gel column chromatography and recrystallization. It should be noted that a certain amount of impurities (grease and solvent) contained in **1a-1c** remained even when purification methods such as preparative TLC, size exclusion chromatography, extraction, and recrystallization were used.

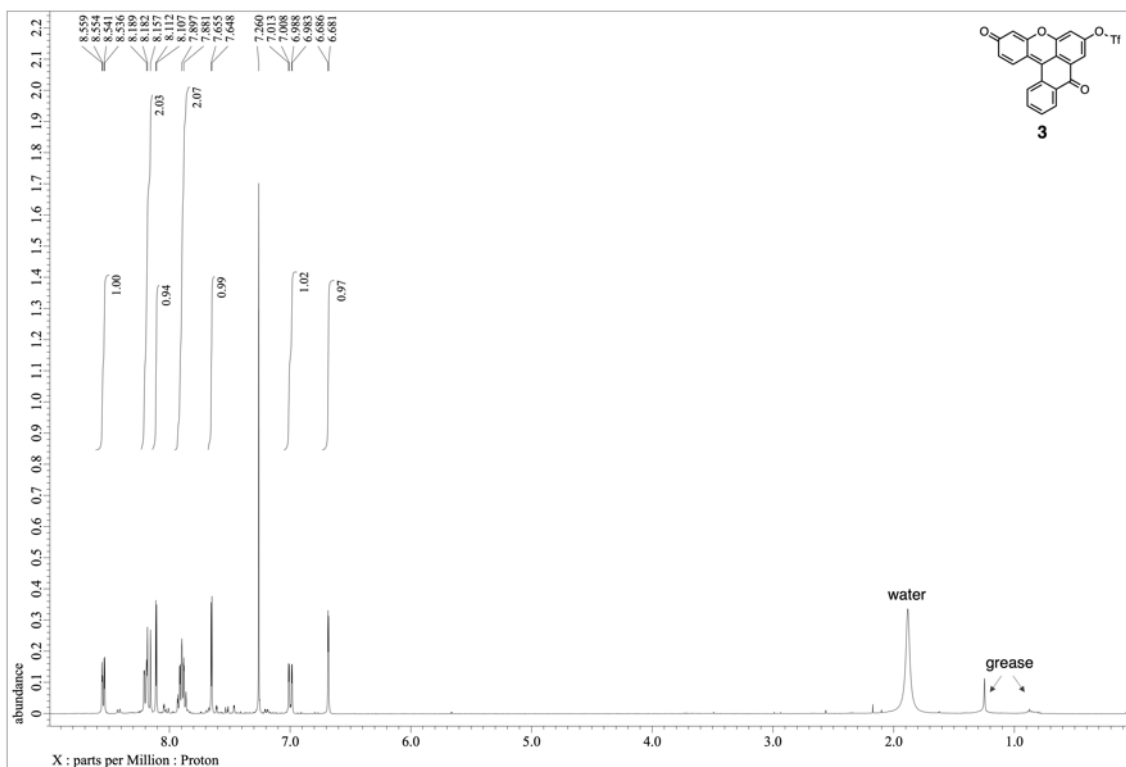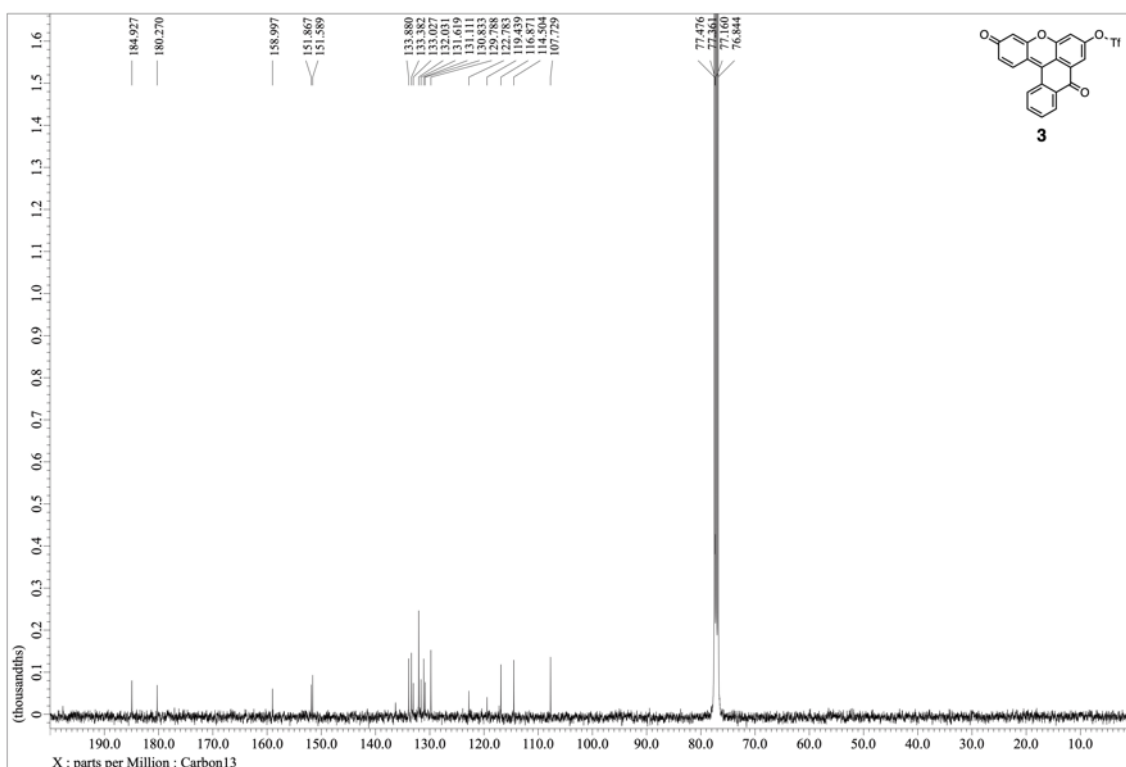

$^1\text{H}$  (top) and  $^{13}\text{C}$  (bottom) NMR spectra of **3** at 25°C in  $\text{CDCl}_3$ .

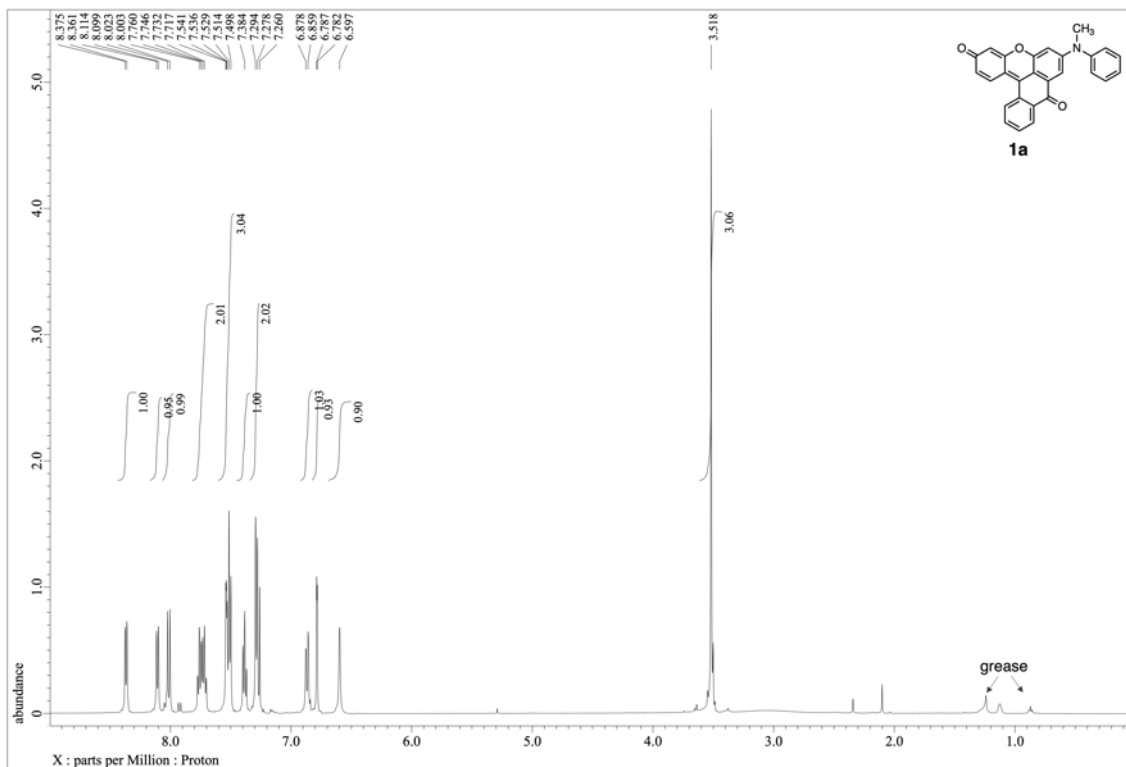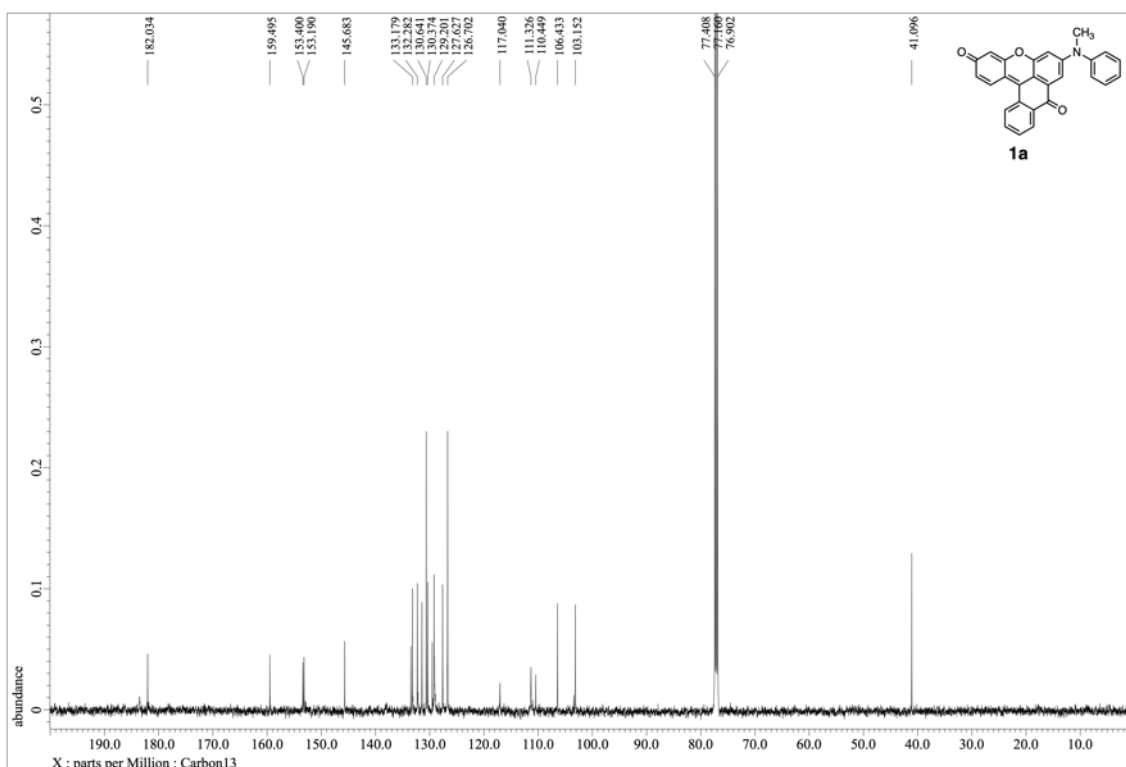

<sup>1</sup>H (top) and <sup>13</sup>C (bottom) NMR spectra of **1a** at 25°C in CDCl<sub>3</sub>.

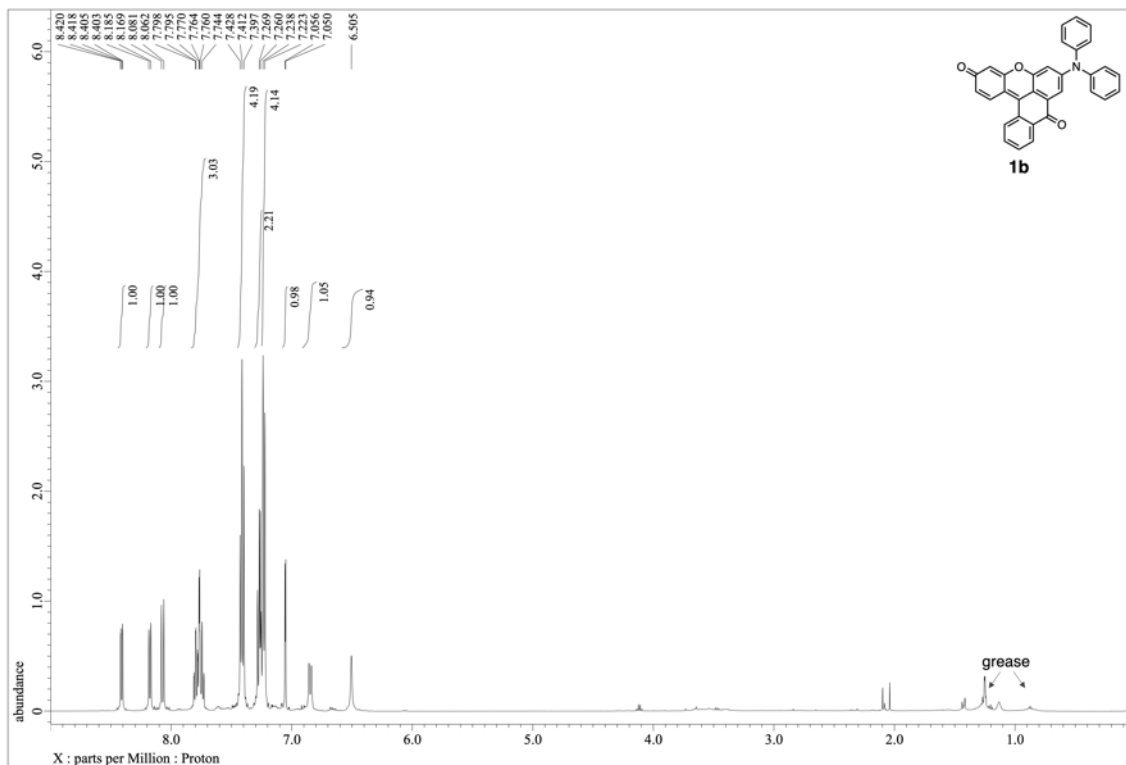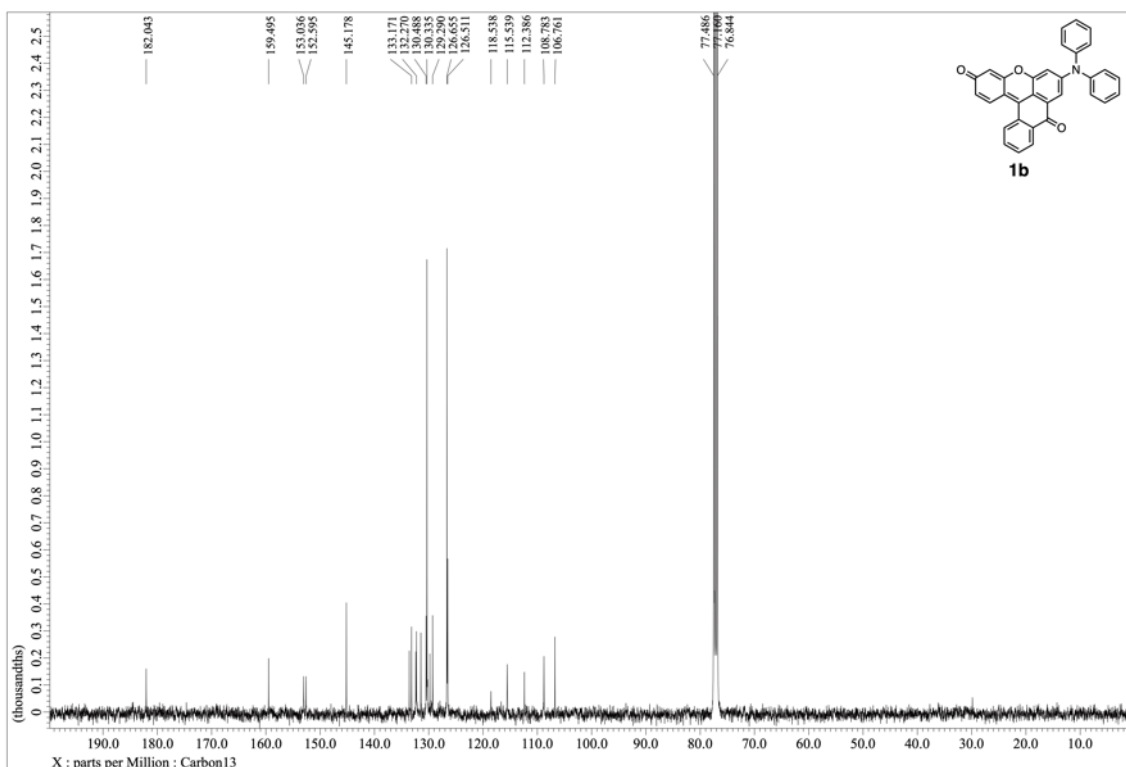

<sup>1</sup>H (top) and <sup>13</sup>C (bottom) NMR spectra of **1b** at 25°C in CDCl<sub>3</sub>.

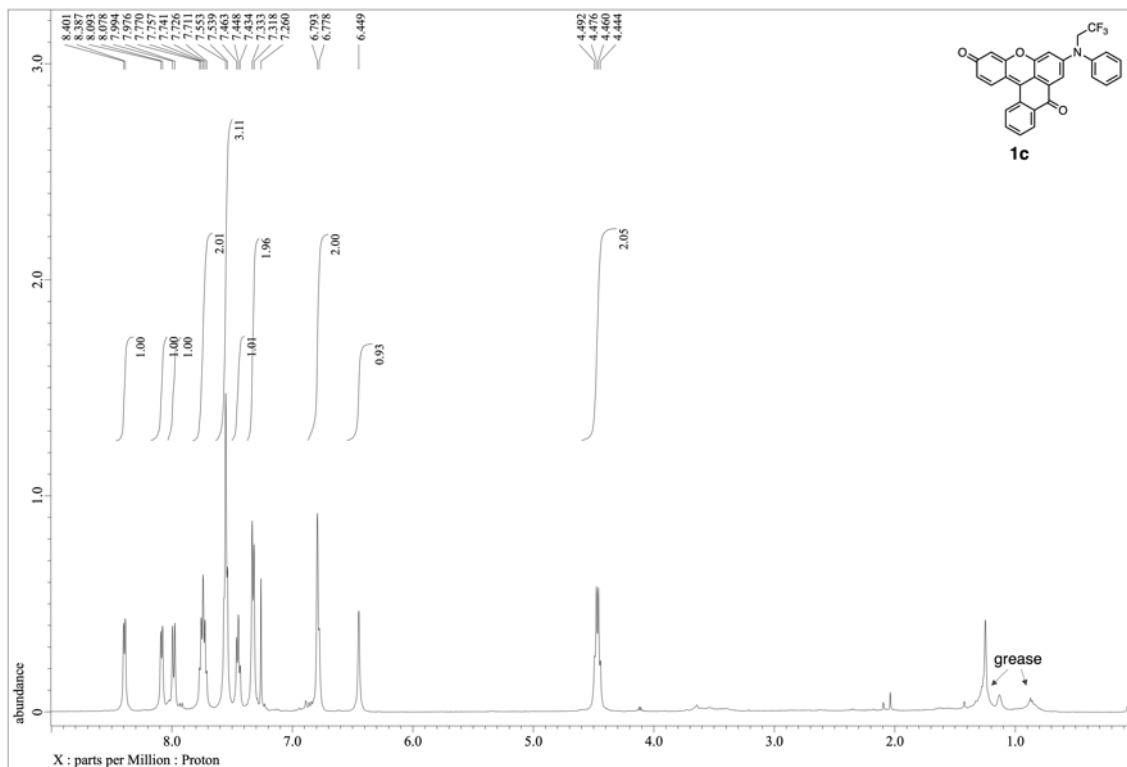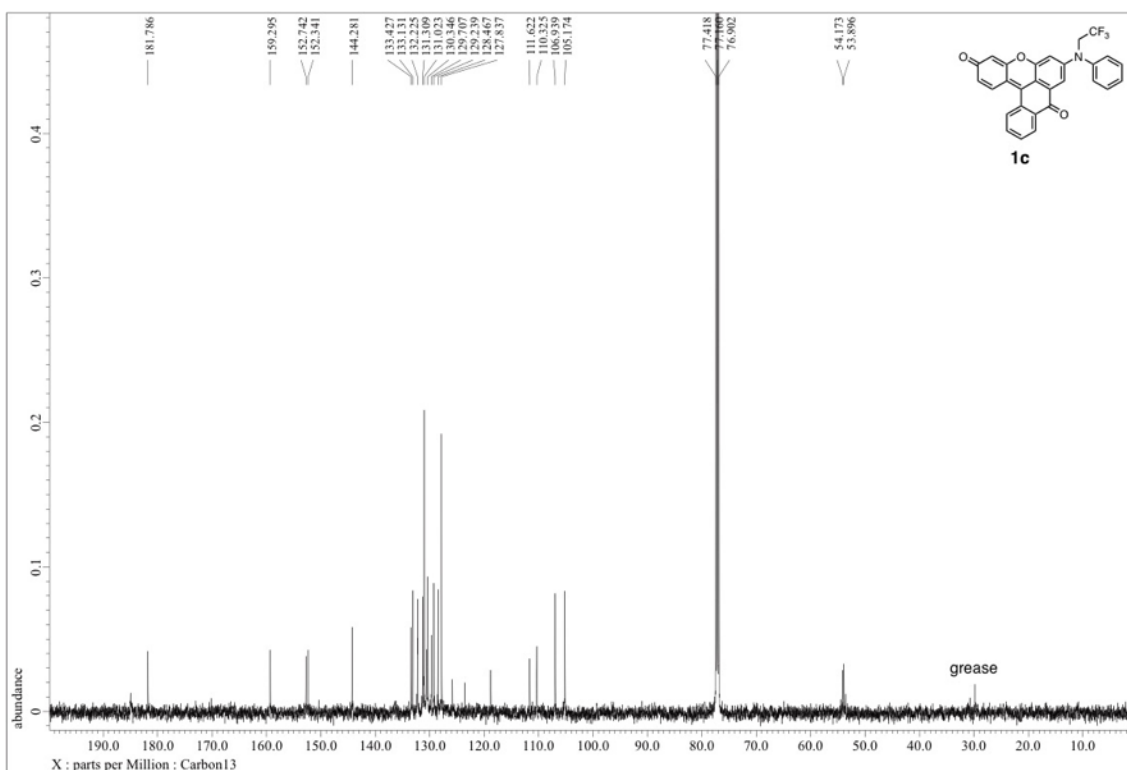

<sup>1</sup>H (top) and <sup>13</sup>C (bottom) NMR spectra of **1c** at 25°C in CDCl<sub>3</sub>.

## 7. Cartesian Coordinates (in Å) and Energies

|                        |           |           |           |                        |           |           |           |
|------------------------|-----------|-----------|-----------|------------------------|-----------|-----------|-----------|
| <b>1a (Fig. S8)</b>    |           |           |           | H                      | 2.429529  | 5.137939  | -0.283746 |
| B3LYP/6-31+G**         |           |           |           | C                      | 2.698056  | 0.572064  | 0.393900  |
| G = -1319.313053 A. U. |           |           |           | O                      | 2.937727  | -4.236439 | -0.116888 |
| C                      | -4.443547 | -0.245337 | 0.168598  | H                      | 2.408779  | -5.031112 | -0.269810 |
| C                      | -3.486631 | -1.306002 | -0.112445 | O                      | -5.669464 | -0.428082 | 0.167562  |
| C                      | -2.148778 | -1.061887 | -0.113089 | O                      | -1.324897 | -2.132100 | -0.377233 |
| C                      | -1.574850 | 0.263592  | 0.085765  | O                      | 3.877208  | 0.629765  | 0.732835  |
| C                      | -2.524646 | 1.295519  | 0.455660  |                        |           |           |           |
| C                      | -3.859535 | 1.066325  | 0.504104  | <b>4a (Fig. S8)</b>    |           |           |           |
| C                      | -0.198571 | 0.437042  | -0.039409 | B3LYP/6-31+G**         |           |           |           |
| C                      | 0.623747  | -0.756103 | -0.064144 | G = -1395.739330 A. U. |           |           |           |
| C                      | 0.020589  | -2.014798 | -0.228922 | C                      | 4.554493  | -3.028945 | 0.116704  |
| C                      | 0.762382  | -3.193342 | -0.270859 | C                      | 3.129397  | -3.258069 | 0.155003  |
| H                      | 0.245887  | -4.136435 | -0.422401 | C                      | 2.248629  | -2.219765 | 0.002491  |
| C                      | 2.147866  | -3.128314 | -0.096745 | C                      | 2.667660  | -0.856138 | -0.205631 |
| C                      | 2.779380  | -1.897271 | 0.125049  | C                      | 4.088282  | -0.626610 | -0.238468 |
| C                      | 2.025522  | -0.728516 | 0.133155  | C                      | 4.981397  | -1.643156 | -0.088322 |
| H                      | -3.864063 | -2.302793 | -0.310641 | C                      | 1.707354  | 0.143064  | -0.337392 |
| H                      | -2.139496 | 2.258204  | 0.766015  | C                      | 0.324421  | -0.202038 | -0.294680 |
| H                      | -4.553233 | 1.839200  | 0.820316  | C                      | -0.039344 | -1.556255 | -0.093511 |
| H                      | 3.848584  | -1.850638 | 0.295497  | C                      | -1.357554 | -1.984305 | -0.031833 |
| C                      | 0.499653  | 1.731630  | -0.132409 | H                      | -1.544639 | -3.036507 | 0.134556  |
| C                      | 1.888592  | 1.798962  | 0.154506  | C                      | -2.407429 | -1.049652 | -0.173069 |
| C                      | -0.132576 | 2.910678  | -0.579014 | C                      | -2.061564 | 0.322955  | -0.385055 |
| C                      | 2.563104  | 3.026805  | 0.118581  | H                      | 2.760798  | -4.267041 | 0.307170  |
| C                      | 0.553864  | 4.121348  | -0.631734 | H                      | 4.440897  | 0.388849  | -0.386043 |
| H                      | -1.154889 | 2.875895  | -0.931589 | H                      | 6.050426  | -1.453506 | -0.114812 |
| C                      | 1.898809  | 4.191434  | -0.252290 | H                      | -2.845564 | 1.057590  | -0.516045 |
| H                      | 3.620472  | 3.031504  | 0.361203  | C                      | 2.108325  | 1.558432  | -0.621773 |
| H                      | 0.039268  | 5.010119  | -0.984606 | C                      | 2.231513  | 2.581281  | 0.348816  |

|   |           |           |           |                          |           |           |           |
|---|-----------|-----------|-----------|--------------------------|-----------|-----------|-----------|
| C | 2.349797  | 1.877211  | -1.967153 | <b>Rh-DER (Fig. S14)</b> |           |           |           |
| C | 2.588548  | 3.878734  | -0.058413 | CAM-B3LYP/cc-pVDZ        |           |           |           |
| C | 2.706117  | 3.169278  | -2.356092 | G = -1344.066413 A. U.   |           |           |           |
| H | 2.252118  | 1.097711  | -2.716327 | C                        | -4.159571 | -1.031381 | -0.025700 |
| C | 2.826098  | 4.177082  | -1.396556 | C                        | -2.903990 | -1.684547 | -0.031119 |
| H | 2.678671  | 4.646717  | 0.701215  | C                        | -1.741032 | -0.948374 | -0.065075 |
| H | 2.887817  | 3.383408  | -3.404701 | C                        | -1.722401 | 0.472566  | -0.095524 |
| H | 3.103018  | 5.185153  | -1.687490 | C                        | -2.994704 | 1.115518  | -0.088484 |
| O | 0.913282  | -2.520493 | 0.055235  | C                        | -4.157406 | 0.408419  | -0.054330 |
| O | 2.030336  | 3.324648  | 2.619910  | C                        | -0.493832 | 1.148573  | -0.125358 |
| N | -3.718326 | -1.452013 | -0.143738 | C                        | 0.694102  | 0.392423  | -0.126271 |
| C | -4.057413 | -2.875700 | -0.048119 | C                        | 0.614951  | -1.024939 | -0.092643 |
| H | -3.567147 | -3.446566 | -0.842723 | C                        | 1.733581  | -1.830342 | -0.087921 |
| H | -3.763973 | -3.293056 | 0.923619  | H                        | 1.605031  | -2.912390 | -0.056093 |
| H | -5.135347 | -2.983487 | -0.157557 | C                        | 3.013530  | -1.246777 | -0.117337 |
| O | 5.394124  | -3.960180 | 0.251532  | C                        | 3.121285  | 0.178431  | -0.162561 |
| C | -4.797090 | -0.508982 | -0.041829 | C                        | 2.000879  | 0.956677  | -0.168473 |
| C | -5.717097 | -0.392239 | -1.091046 | H                        | -2.811390 | -2.765716 | 0.010335  |
| C | -4.959307 | 0.257976  | 1.119443  | H                        | -3.024480 | 2.204449  | -0.119185 |
| C | -6.794409 | 0.491103  | -0.978562 | H                        | -5.098407 | 0.951342  | -0.068242 |
| H | -5.584045 | -0.988176 | -1.988965 | H                        | 4.106825  | 0.636675  | -0.211659 |
| C | -6.031579 | 1.147899  | 1.222298  | C                        | -0.446102 | 2.638183  | -0.171578 |
| H | -4.248839 | 0.154420  | 1.933850  | C                        | -0.352160 | 3.391074  | 1.012119  |
| C | -6.952297 | 1.264940  | 0.175649  | C                        | -0.496686 | 3.271199  | -1.416369 |
| H | -7.504293 | 0.578576  | -1.795589 | C                        | -0.311124 | 4.782626  | 0.898483  |
| H | -6.151939 | 1.741077  | 2.123895  | C                        | -0.452001 | 4.658640  | -1.503826 |
| H | -7.787690 | 1.953380  | 0.259884  | H                        | -0.569441 | 2.668668  | -2.323861 |
| C | -0.747062 | 0.719574  | -0.442679 | C                        | -0.358965 | 5.414791  | -0.340277 |
| H | -0.520402 | 1.766010  | -0.615255 | H                        | -0.240191 | 5.382571  | 1.807878  |
| C | 2.016682  | 2.403842  | 1.816474  | H                        | -0.490186 | 5.144626  | -2.479481 |
| O | 1.810846  | 1.130924  | 2.203225  | H                        | -0.323966 | 6.503878  | -0.394779 |
| H | 1.680292  | 1.131230  | 3.168113  | O                        | -0.584163 | -1.650787 | -0.060710 |



|   |           |           |           |                                        |           |           |           |
|---|-----------|-----------|-----------|----------------------------------------|-----------|-----------|-----------|
| N | 4.107594  | -2.043807 | -0.121756 | H                                      | -7.322972 | -1.588530 | -1.900883 |
| C | 5.473455  | -1.634404 | -0.075119 |                                        |           |           |           |
| C | 6.336515  | -2.037859 | -1.093158 | <b>1a</b> (Fig. 2a, Fig. 3a, Fig. S13) |           |           |           |
| C | 5.955201  | -0.885526 | 0.999281  | CAM-B3LYP/cc-pVDZ                      |           |           |           |
| C | 7.681849  | -1.687350 | -1.037364 | G = -1318.602458 A. U.                 |           |           |           |
| H | 5.949448  | -2.622583 | -1.929554 | C                                      | 5.065698  | -2.592286 | -0.073842 |
| C | 7.297700  | -0.522191 | 1.037687  | C                                      | 3.659842  | -2.899448 | 0.151892  |
| H | 5.281013  | -0.602210 | 1.808920  | C                                      | 2.711597  | -1.935167 | 0.120250  |
| C | 8.163015  | -0.923588 | 0.022815  | C                                      | 3.016048  | -0.520777 | -0.074201 |
| H | 8.355981  | -2.007243 | -1.833032 | C                                      | 4.404217  | -0.229990 | -0.391425 |
| H | 7.673097  | 0.064773  | 1.877105  | C                                      | 5.355604  | -1.182475 | -0.399488 |
| H | 9.216916  | -0.645161 | 0.061585  | C                                      | 1.997821  | 0.406124  | 0.012949  |
| H | 2.094346  | 2.041491  | -0.217143 | C                                      | 0.639856  | -0.093920 | 0.016153  |
| C | -0.299516 | 2.729074  | 2.364238  | C                                      | 0.399074  | -1.460967 | 0.170804  |
| H | -1.183129 | 2.096671  | 2.541249  | C                                      | -0.880755 | -1.998667 | 0.183861  |
| H | 0.585304  | 2.081566  | 2.464725  | H                                      | -0.969432 | -3.070698 | 0.339420  |
| H | -0.257943 | 3.477953  | 3.165359  | C                                      | -1.997014 | -1.168797 | -0.011395 |
| H | 3.942221  | -3.039666 | -0.211177 | C                                      | -1.767152 | 0.208544  | -0.232935 |
| N | -5.316195 | -1.723490 | 0.000922  | C                                      | -0.486511 | 0.723656  | -0.206946 |
| C | -5.342533 | -3.186160 | -0.061092 | H                                      | 3.380699  | -3.935316 | 0.341392  |
| H | -6.289799 | -3.467850 | -0.541703 | H                                      | 4.659354  | 0.782294  | -0.695424 |
| H | -4.548830 | -3.532438 | -0.736903 | H                                      | 6.386915  | -0.956681 | -0.675561 |
| C | -5.229868 | -3.850174 | 1.305803  | H                                      | -2.586355 | 0.892516  | -0.443995 |
| H | -5.286980 | -4.943415 | 1.200697  | C                                      | 2.166755  | 1.873005  | 0.087252  |
| H | -4.278655 | -3.602119 | 1.798832  | C                                      | 1.077020  | 2.712892  | -0.226753 |
| H | -6.047319 | -3.532046 | 1.969790  | C                                      | 3.347416  | 2.484364  | 0.538993  |
| C | -6.624258 | -1.069015 | 0.094786  | C                                      | 1.219931  | 4.101007  | -0.211687 |
| H | -6.545673 | -0.188955 | 0.746445  | C                                      | 3.474210  | 3.867249  | 0.570805  |
| H | -7.290283 | -1.768286 | 0.619417  | H                                      | 4.167253  | 1.874765  | 0.909930  |
| C | -7.213134 | -0.700396 | -1.260918 | C                                      | 2.420213  | 4.683959  | 0.165482  |
| H | -8.209192 | -0.252491 | -1.131536 | H                                      | 0.349104  | 4.699914  | -0.478441 |
| H | -6.578518 | 0.022782  | -1.793882 | H                                      | 4.404967  | 4.310302  | 0.928923  |

|                        |           |           |           |   |           |           |           |
|------------------------|-----------|-----------|-----------|---|-----------|-----------|-----------|
| H                      | 2.525444  | 5.769723  | 0.180475  | C | 3.383542  | 0.908356  | 0.295653  |
| C                      | -0.288769 | 2.171496  | -0.475636 | C | 0.429557  | -1.307808 | -0.106226 |
| O                      | 1.422221  | -2.332761 | 0.338145  | C | 2.699728  | -0.232272 | -0.067725 |
| O                      | -1.207932 | 2.892312  | -0.819655 | C | 3.275282  | 3.357630  | 0.631837  |
| N                      | -3.271924 | -1.692581 | -0.035151 | H | 2.698235  | 4.281641  | 0.638943  |
| C                      | -3.470235 | -3.126070 | 0.079265  | C | 1.055638  | -2.654290 | -0.140460 |
| H                      | -2.906528 | -3.669937 | -0.694882 | C | 3.308470  | -1.527729 | -0.435705 |
| H                      | -3.158280 | -3.510653 | 1.066903  | C | -1.578419 | 0.048367  | -0.027844 |
| H                      | -4.535449 | -3.345453 | -0.050544 | C | 4.703750  | 3.431893  | 0.909027  |
| O                      | 5.951016  | -3.438530 | -0.036528 | C | 4.789534  | 0.972470  | 0.660774  |
| C                      | -4.424861 | -0.852689 | 0.038829  | H | 5.334836  | 0.037496  | 0.764119  |
| C                      | -5.340039 | -0.839308 | -1.014278 | C | 2.522842  | -2.699234 | -0.394740 |
| C                      | -4.663191 | -0.070651 | 1.170652  | C | -3.612996 | 1.340186  | -0.495978 |
| C                      | -6.488035 | -0.056522 | -0.932369 | C | -0.951057 | -1.210209 | -0.082765 |
| H                      | -5.140560 | -1.442864 | -1.901293 | H | -1.528805 | -2.132041 | -0.106995 |
| C                      | -5.803658 | 0.722829  | 1.241924  | C | -0.771924 | 1.192644  | 0.040093  |
| H                      | -3.945705 | -0.086354 | 1.992454  | H | -1.202549 | 2.189152  | 0.117363  |
| C                      | -6.720671 | 0.728798  | 0.193481  | C | 4.624481  | -1.645485 | -0.911447 |
| H                      | -7.198952 | -0.051660 | -1.760262 | H | 5.224054  | -0.754228 | -1.077856 |
| H                      | -5.981095 | 1.334540  | 2.128025  | C | 5.404734  | 2.133436  | 0.952075  |
| H                      | -7.616811 | 1.348341  | 0.253429  | H | 6.450643  | 2.163571  | 1.261815  |
|                        |           |           |           | C | 3.081265  | -3.942528 | -0.694417 |
| <b>1b</b> (Fig. S13)   |           |           |           | H | 2.431331  | -4.815320 | -0.631058 |
| CAM-B3LYP/cc-pVDZ      |           |           |           | C | -3.788881 | -0.897392 | 0.475217  |
| G = -1510.196956 A. U. |           |           |           | C | 5.166276  | -2.884879 | -1.227116 |
| O                      | 1.322472  | 2.219474  | 0.129347  | H | 6.191624  | -2.941365 | -1.596295 |
| O                      | 5.289619  | 4.484838  | 1.128360  | C | -4.577063 | 1.971216  | 0.293399  |
| O                      | 0.395326  | -3.671107 | -0.027596 | H | -4.821285 | 1.557373  | 1.272430  |
| N                      | -2.970647 | 0.156831  | -0.027226 | C | -3.301636 | 1.865276  | -1.753372 |
| C                      | 1.251721  | -0.166464 | -0.072976 | H | -2.556619 | 1.365770  | -2.374096 |
| C                      | 0.609268  | 1.071104  | 0.030945  | C | 4.406060  | -4.044997 | -1.090893 |
| C                      | 2.665245  | 2.177952  | 0.376909  | H | 4.836762  | -5.018617 | -1.329023 |

|   |           |           |           |   |           |           |           |
|---|-----------|-----------|-----------|---|-----------|-----------|-----------|
| C | -5.221525 | 3.112818  | -0.172138 | H | 1.017804  | -2.404728 | 0.061787  |
| H | -5.974263 | 3.597078  | 0.452313  | C | -0.667951 | -1.124048 | 0.070420  |
| C | -4.901727 | 3.643592  | -1.419093 | C | -2.233718 | 2.820440  | -0.085039 |
| H | -5.403982 | 4.542746  | -1.778960 | C | -2.824849 | -2.077258 | 0.163830  |
| C | -4.870513 | -1.357040 | -0.279545 | C | -3.109282 | 1.732711  | -0.290232 |
| H | -5.068393 | -0.913486 | -1.256043 | C | 1.077067  | 1.007648  | 0.272597  |
| C | -3.937494 | 3.016691  | -2.205073 | H | 1.722929  | 1.874569  | 0.390470  |
| H | -3.685062 | 3.419562  | -3.187444 | C | -3.431563 | -0.748405 | 0.176059  |
| C | -3.534426 | -1.461144 | 1.728189  | C | 3.877011  | 0.597709  | 0.381065  |
| H | -2.695578 | -1.095944 | 2.322052  | C | 5.253911  | 2.202156  | -0.775335 |
| C | -4.344690 | -2.483915 | 2.209770  | H | 5.637446  | 2.616596  | -1.708952 |
| H | -4.133943 | -2.920493 | 3.187468  | C | 4.368930  | 1.128458  | -0.809550 |
| C | -5.425766 | -2.939024 | 1.459047  | H | 4.058819  | 0.686563  | -1.756352 |
| H | -6.063420 | -3.737021 | 1.842224  | C | 5.653685  | 2.741230  | 0.444851  |
| C | -5.687294 | -2.367643 | 0.216258  | H | 6.348982  | 3.581846  | 0.469048  |
| H | -6.530271 | -2.718800 | -0.381360 | C | -0.793651 | 2.621874  | 0.240551  |

**1c** (Fig. S13)

CAM-B3LYP/cc-pVDZ

G = -1655.587784 A. U.

|   |           |           |           |   |           |           |           |
|---|-----------|-----------|-----------|---|-----------|-----------|-----------|
| O | -1.474420 | -2.210155 | 0.001050  | H | -1.953312 | 4.933113  | -0.095553 |
| F | 4.773679  | -1.914707 | -1.395443 | C | 4.273264  | 1.138980  | 1.603904  |
| F | 2.843160  | -2.884171 | -1.402840 | H | 3.871684  | 0.723172  | 2.529824  |
| F | 4.483953  | -3.755881 | -0.288019 | C | 3.522197  | -1.818785 | 0.615030  |
| O | -0.059652 | 3.560571  | 0.491288  | H | 2.826757  | -2.441509 | 1.195734  |
| O | -5.671251 | -4.212305 | 0.497883  | H | 4.441388  | -1.709016 | 1.206084  |
| N | 2.968648  | -0.513643 | 0.350494  | C | -4.377768 | 2.012970  | -0.823508 |
| C | 1.598940  | -0.301642 | 0.242409  | H | -5.036791 | 1.199225  | -1.114851 |
| C | -1.200244 | 0.167123  | 0.050411  | C | -4.989389 | -3.197233 | 0.429954  |
| C | -0.284436 | 1.228027  | 0.169734  | C | -3.543501 | -3.219394 | 0.250500  |
| C | -2.634716 | 0.358690  | -0.023651 | H | -3.044291 | -4.185990 | 0.193022  |
| C | 0.696456  | -1.369553 | 0.131389  | C | 5.164757  | 2.207256  | 1.634577  |
|   |           |           |           | H | 5.471938  | 2.629602  | 2.592573  |
|   |           |           |           | C | -4.794413 | 3.320513  | -1.038015 |
|   |           |           |           | H | -5.785874 | 3.503590  | -1.455487 |

|   |           |           |           |
|---|-----------|-----------|-----------|
| C | -4.860034 | -0.727310 | 0.446452  |
| H | -5.334603 | 0.235836  | 0.617691  |
| C | -3.951611 | 4.389707  | -0.740025 |
| H | -4.284526 | 5.416341  | -0.899152 |
| C | -5.585204 | -1.854115 | 0.571553  |
| H | -6.649216 | -1.824815 | 0.811912  |
| C | 3.904815  | -2.594655 | -0.631814 |
